# Supplementary material for: Mutation Discovery in Regions of Segmental Cancer Genome Amplifications with CoNAn-SNV: A Mixture Model for Next Generation Sequencing of Tumors
Source: PubMed Central journal article supplement (PMC3420914; doi:10.1371/journal.pone.0041551), 2012-08-16

Chromosome: 1

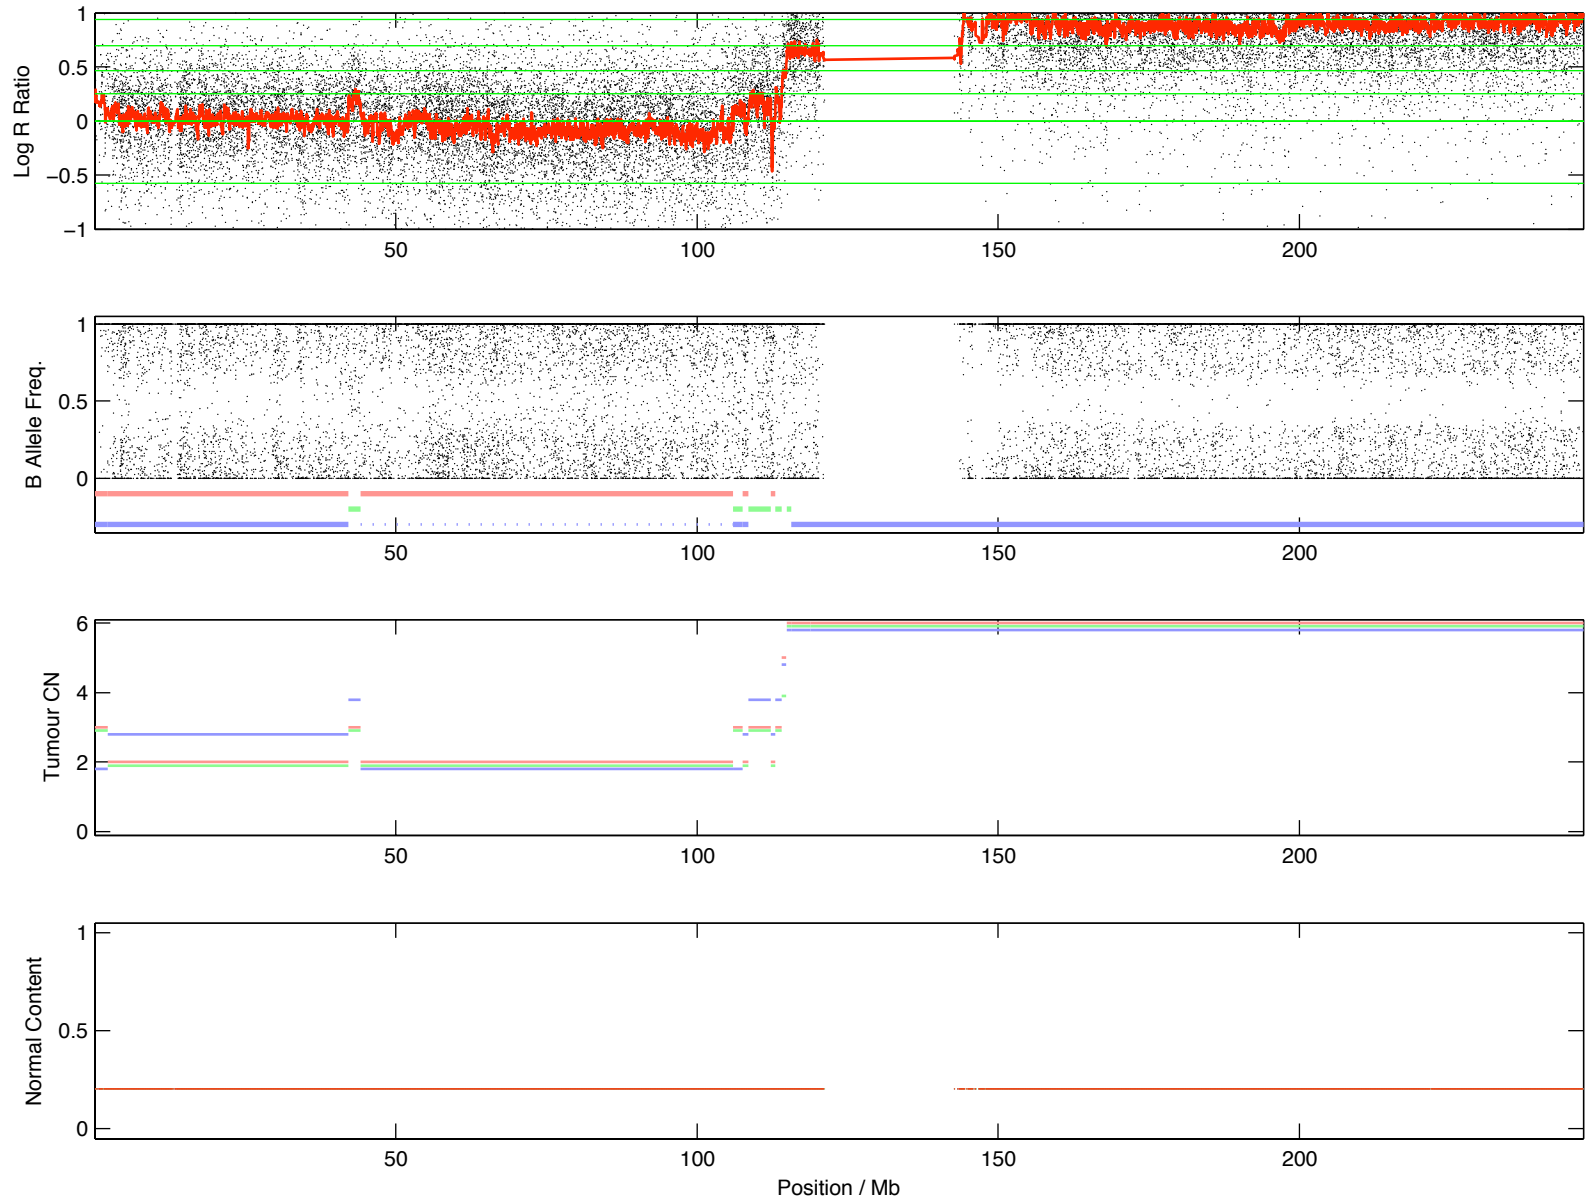

Chromosome: 2

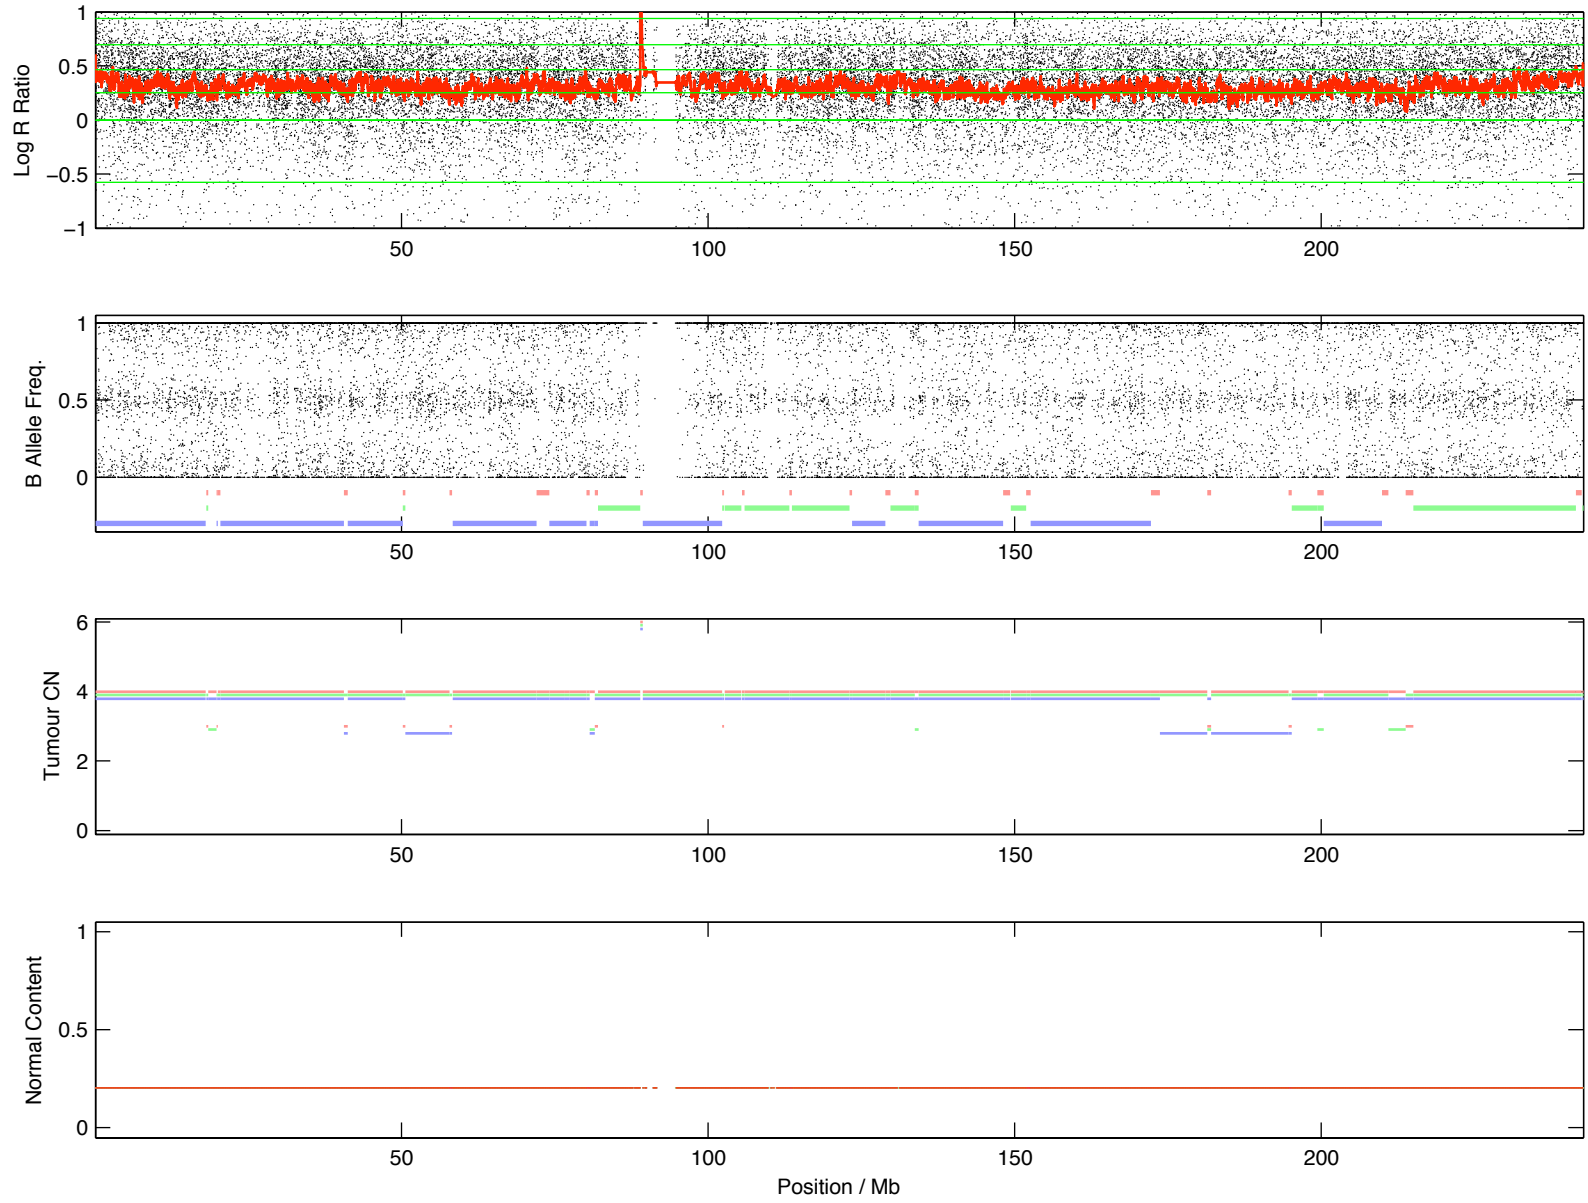

Chromosome: 3

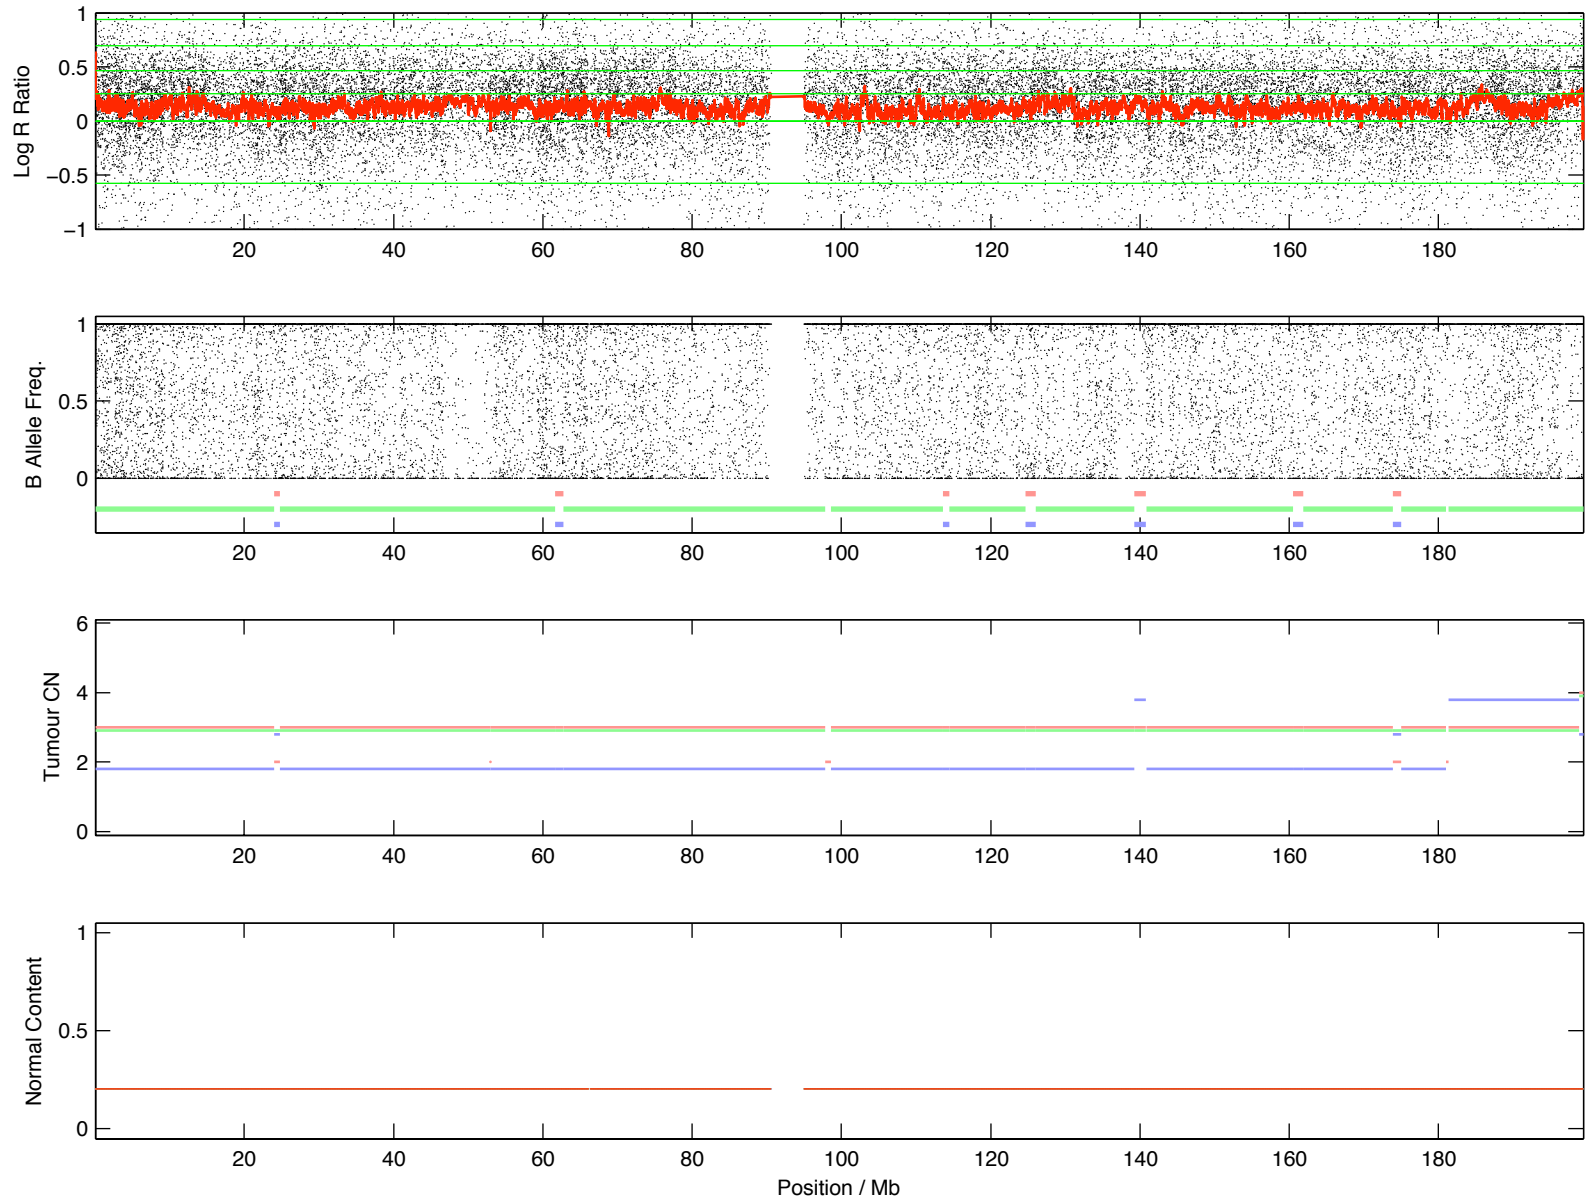

Chromosome: 4

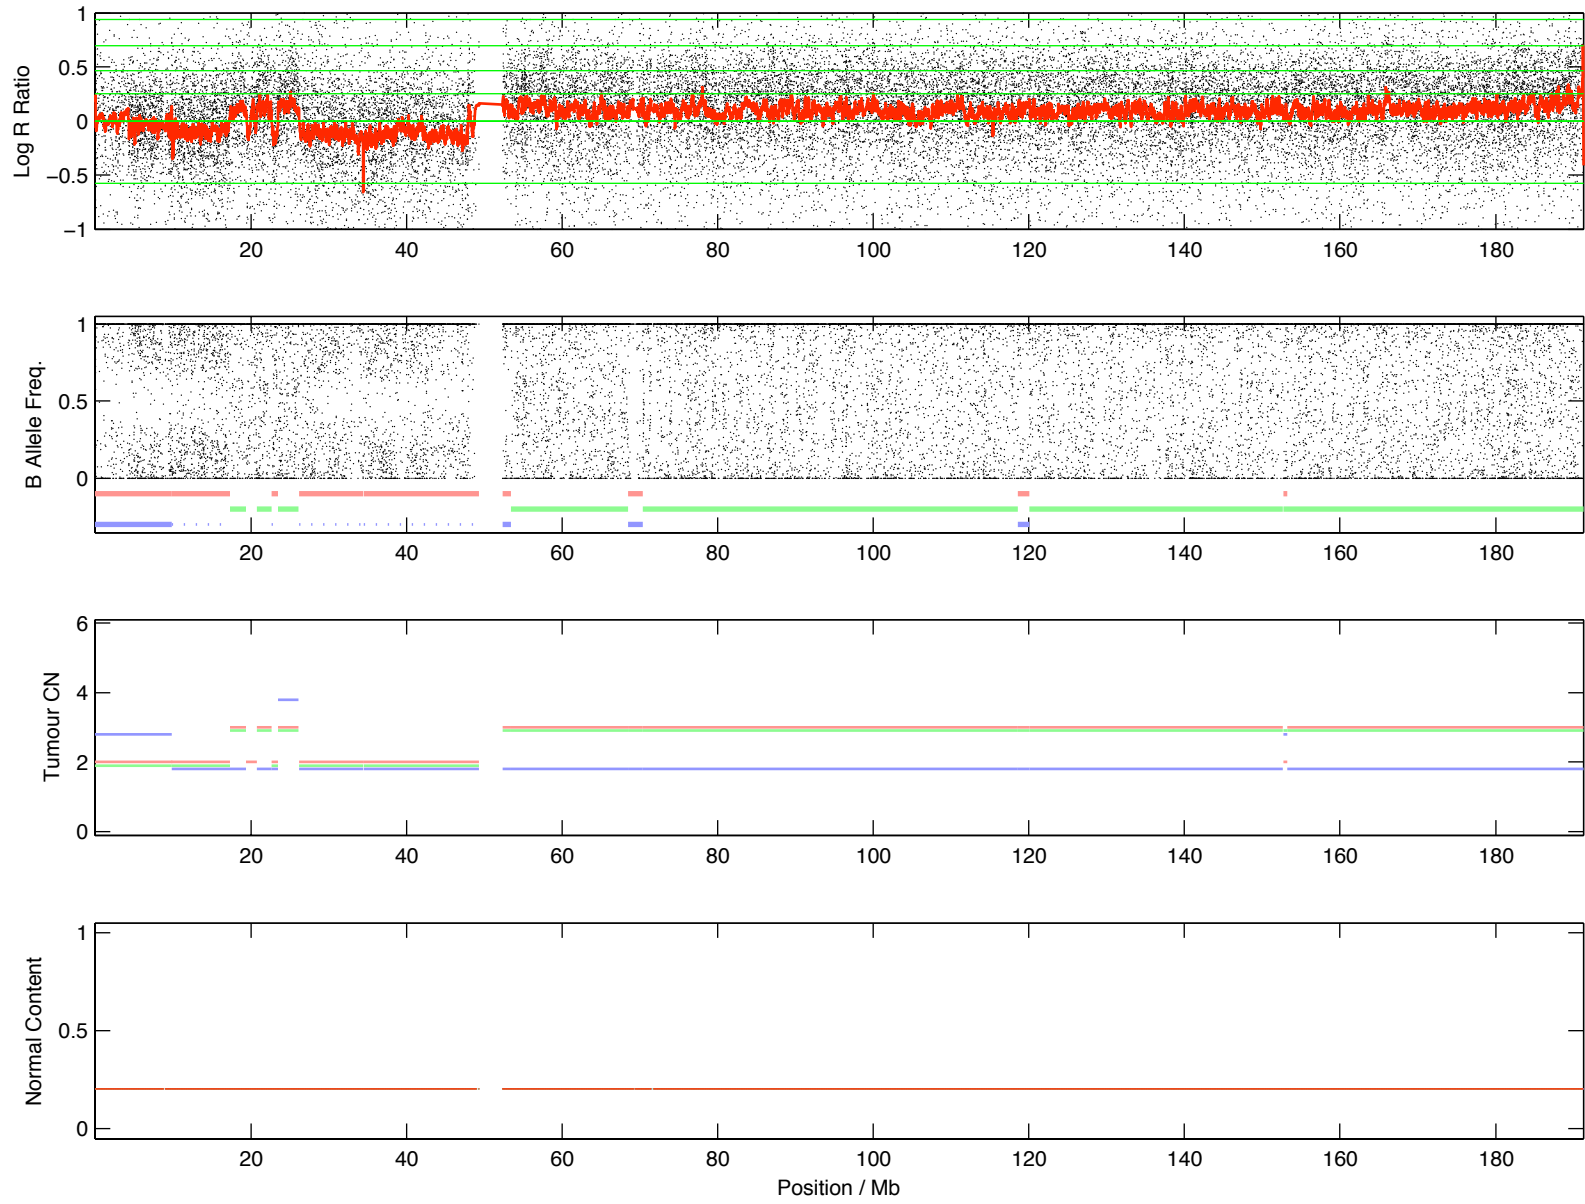

Chromosome: 5

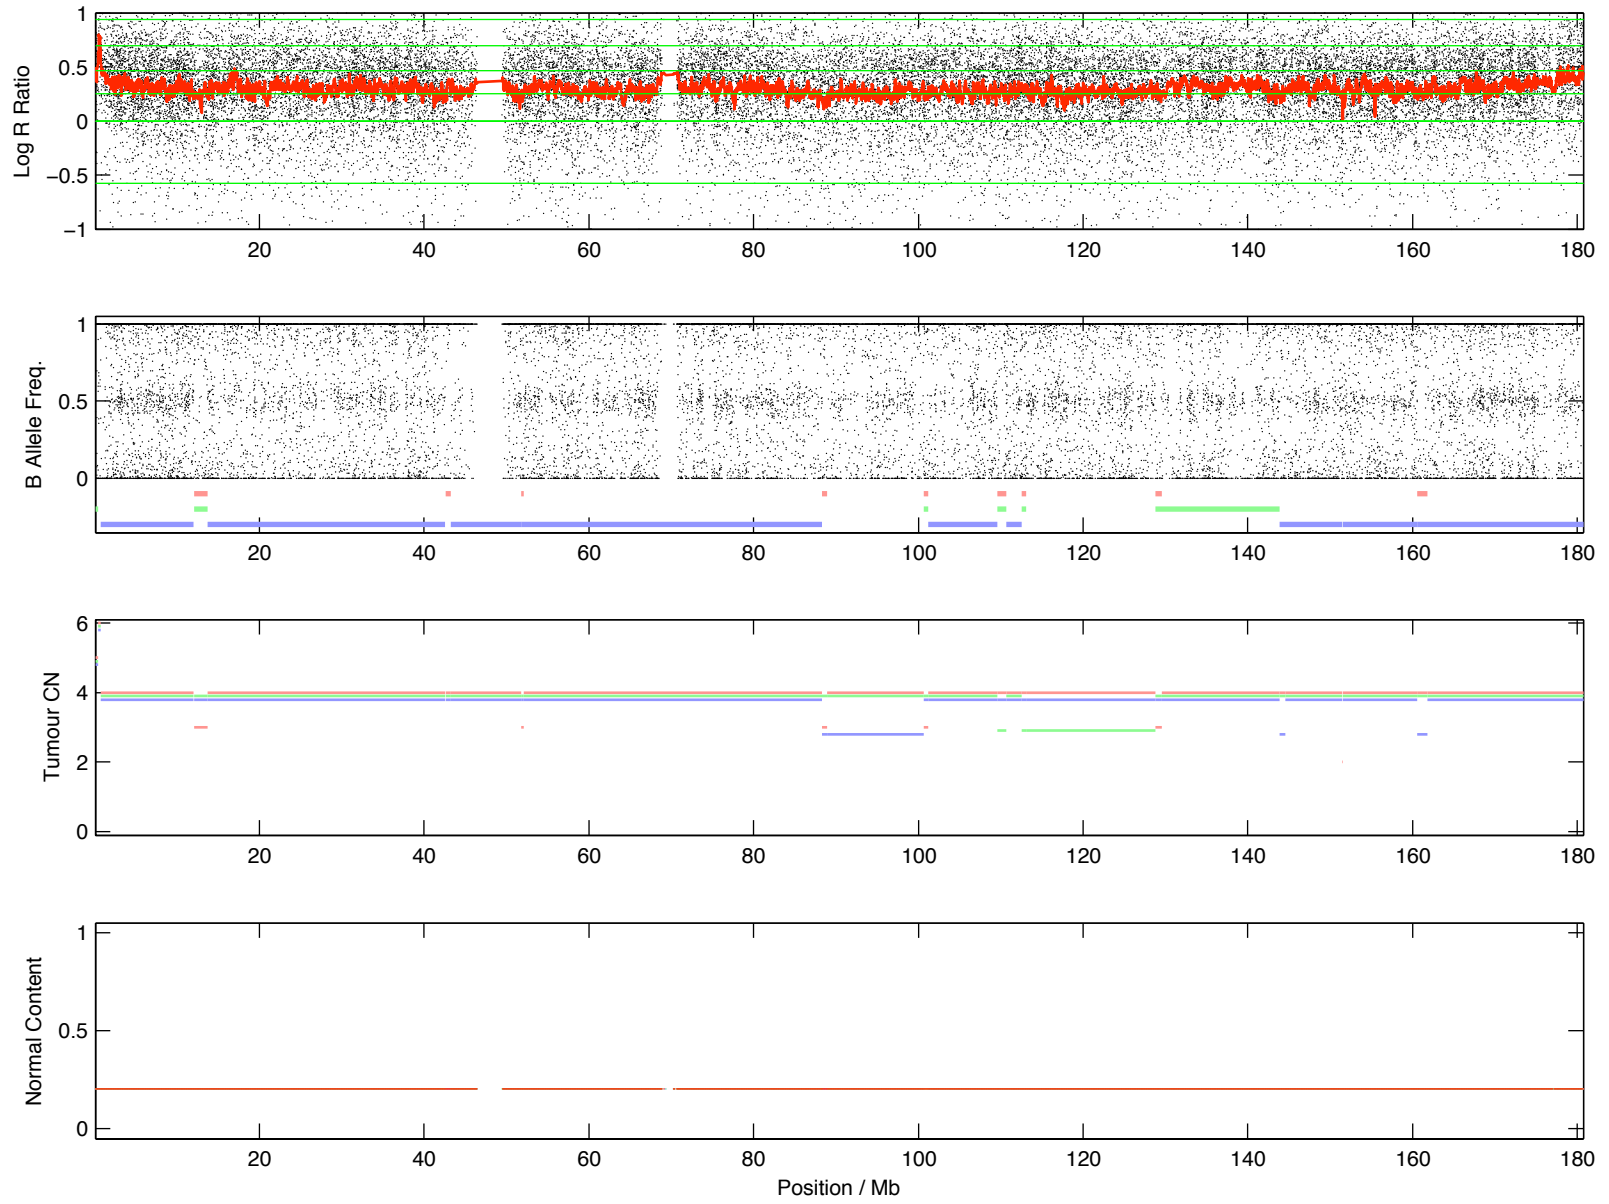

Chromosome: 6

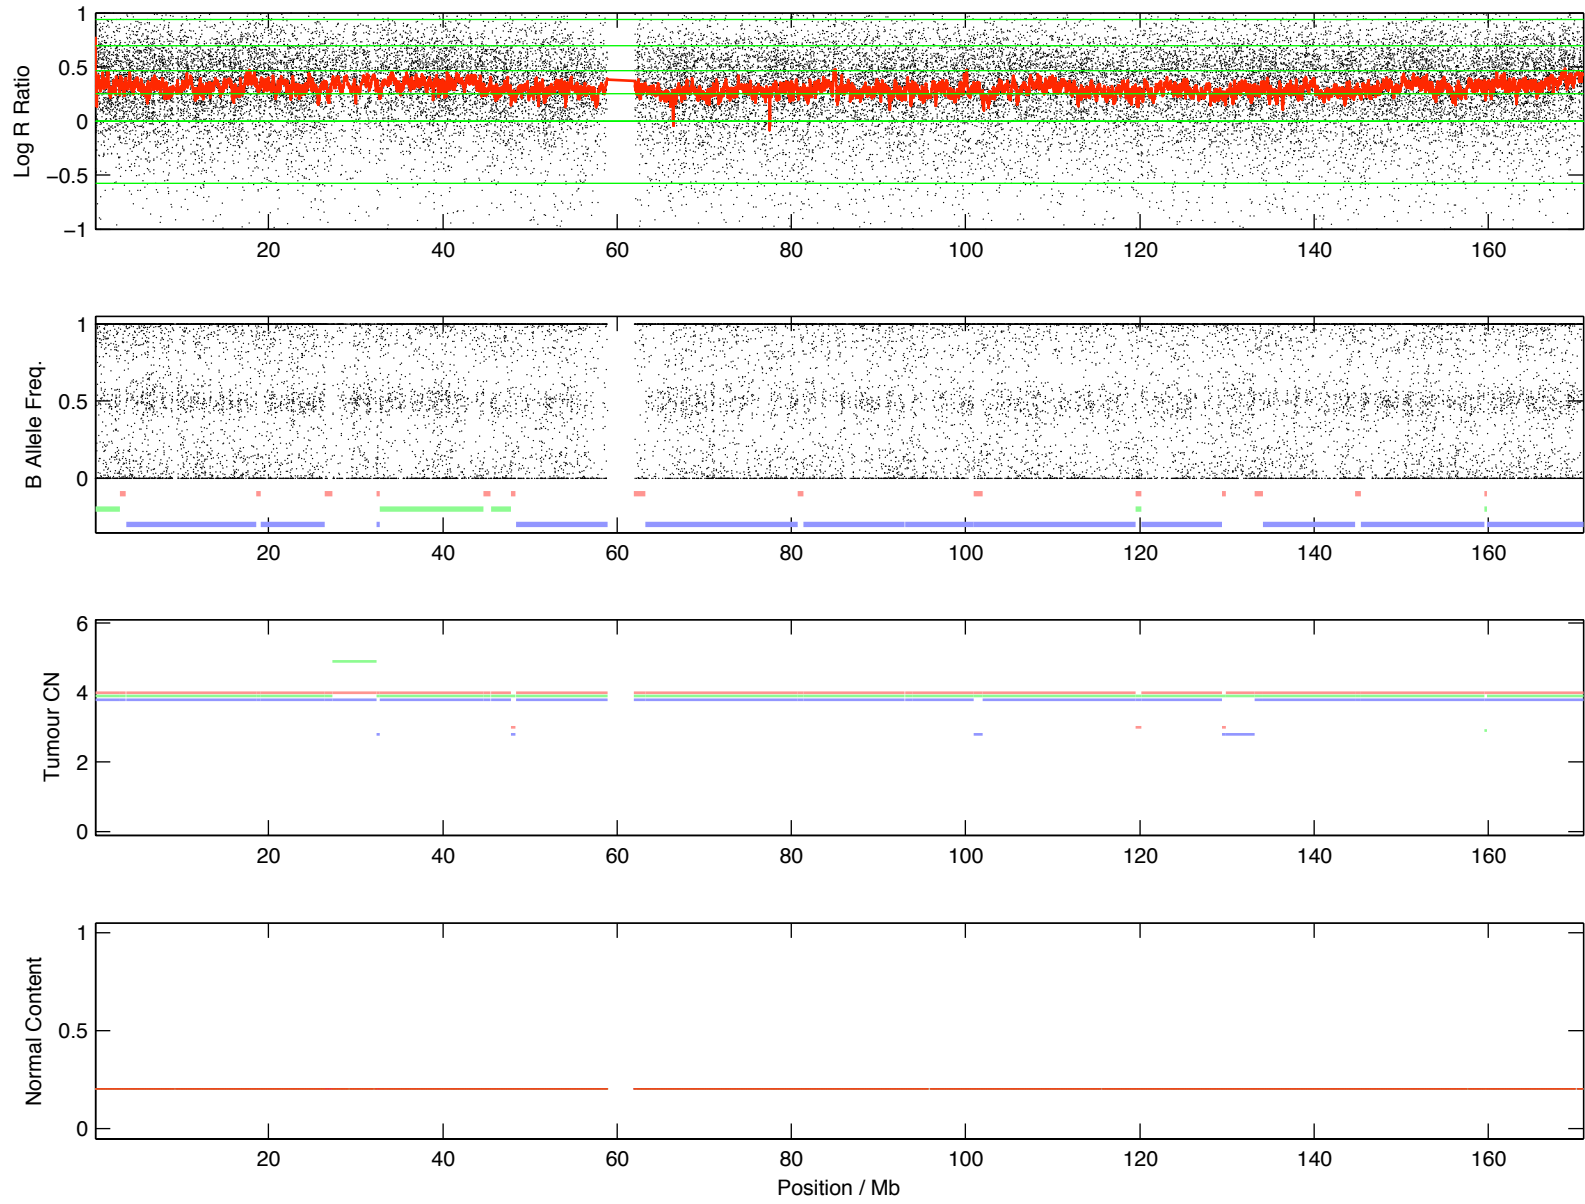

Chromosome: 7

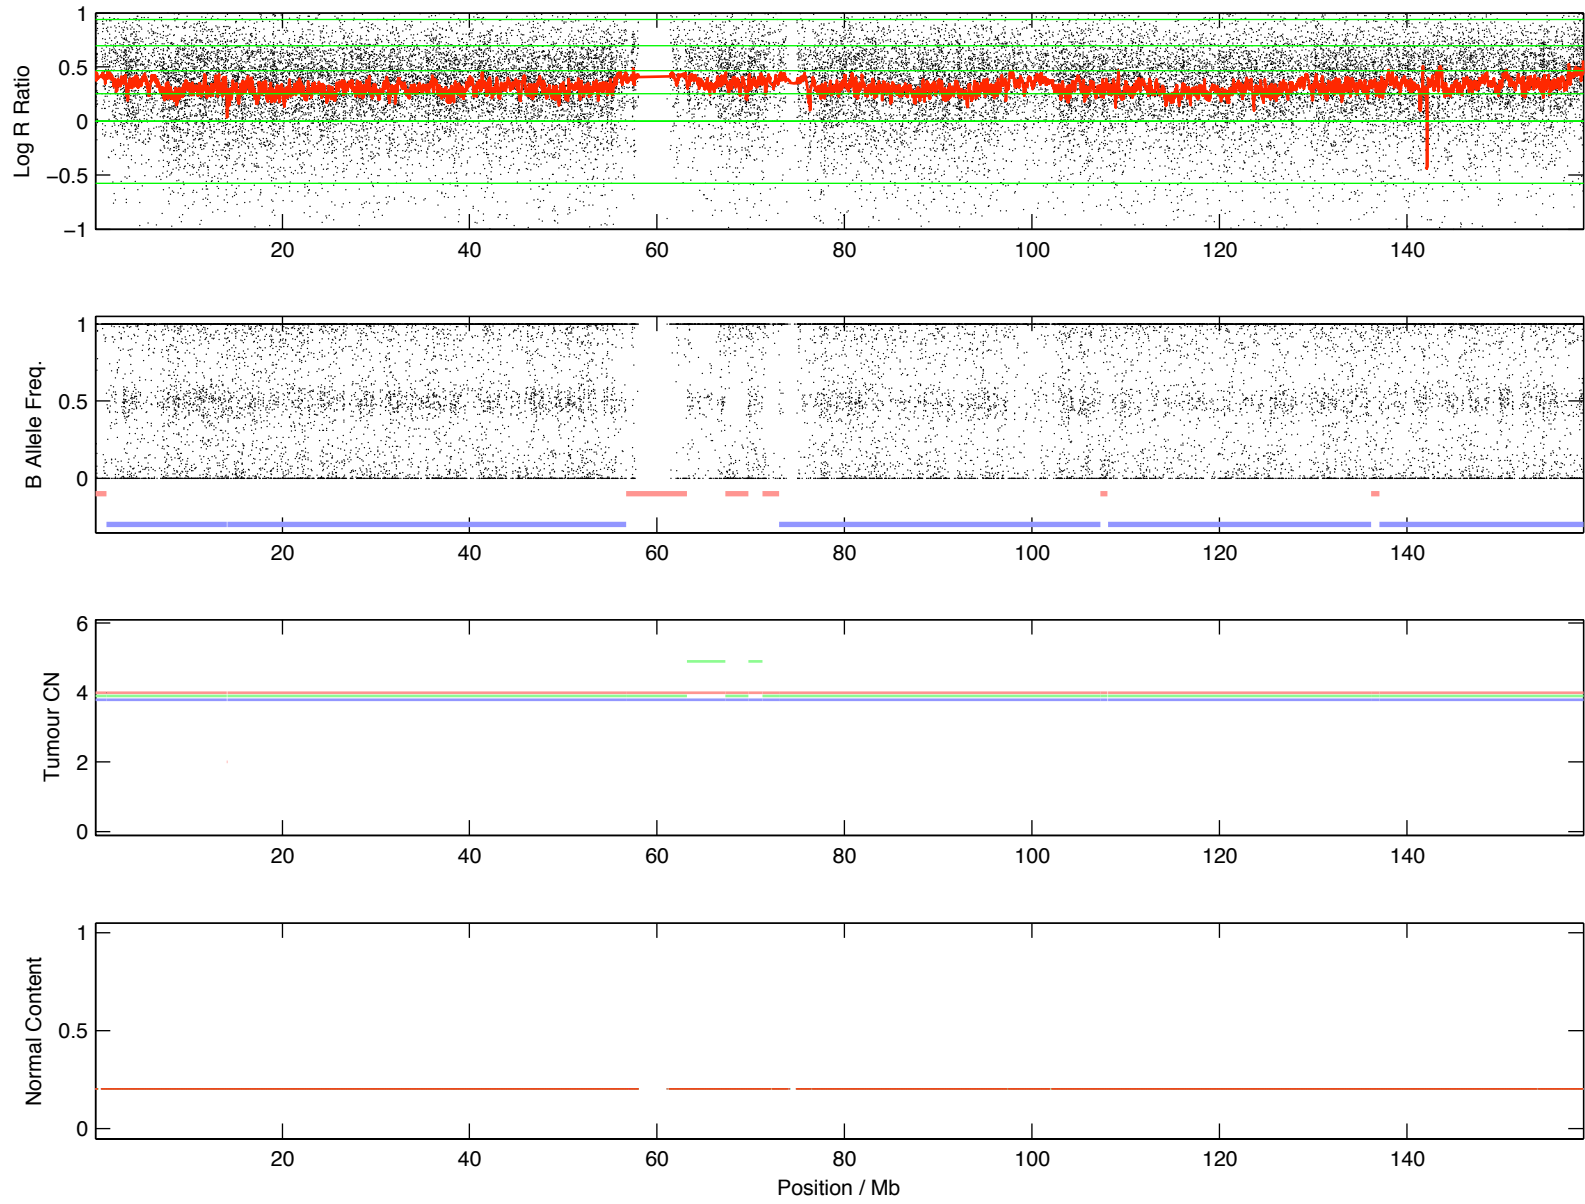

Chromosome: 8

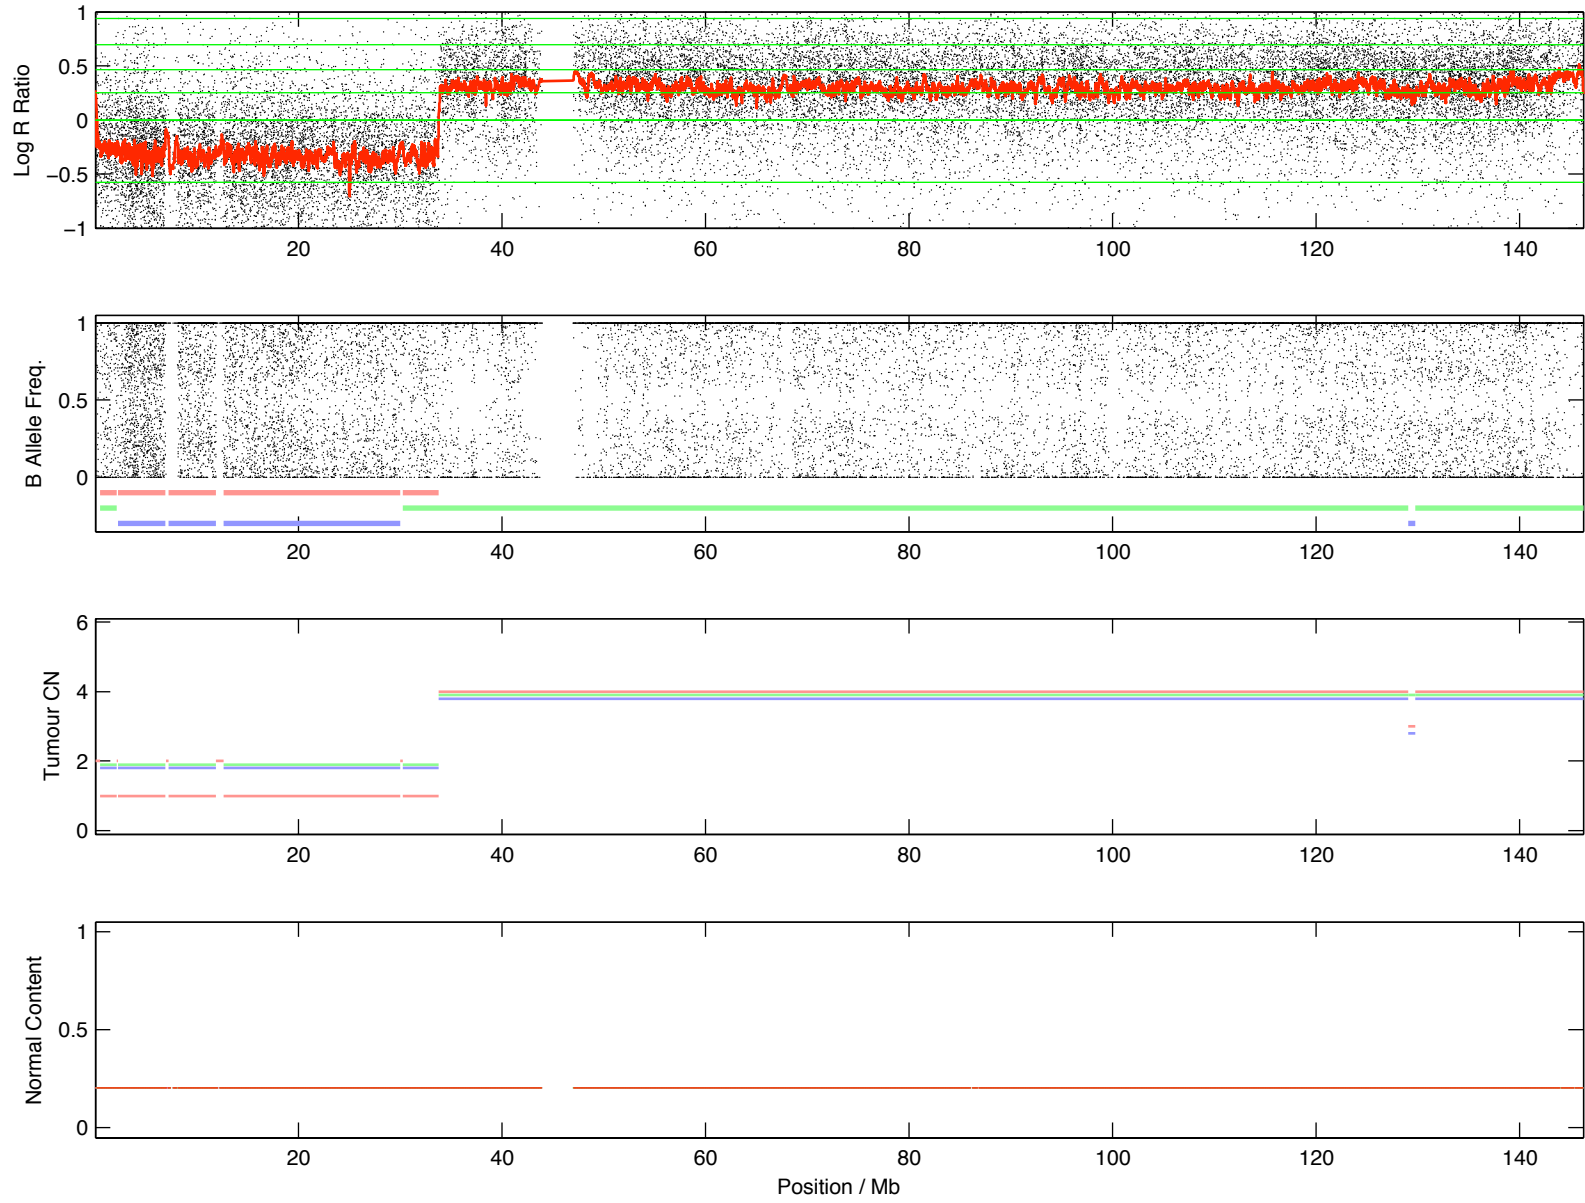



Chromosome: 9

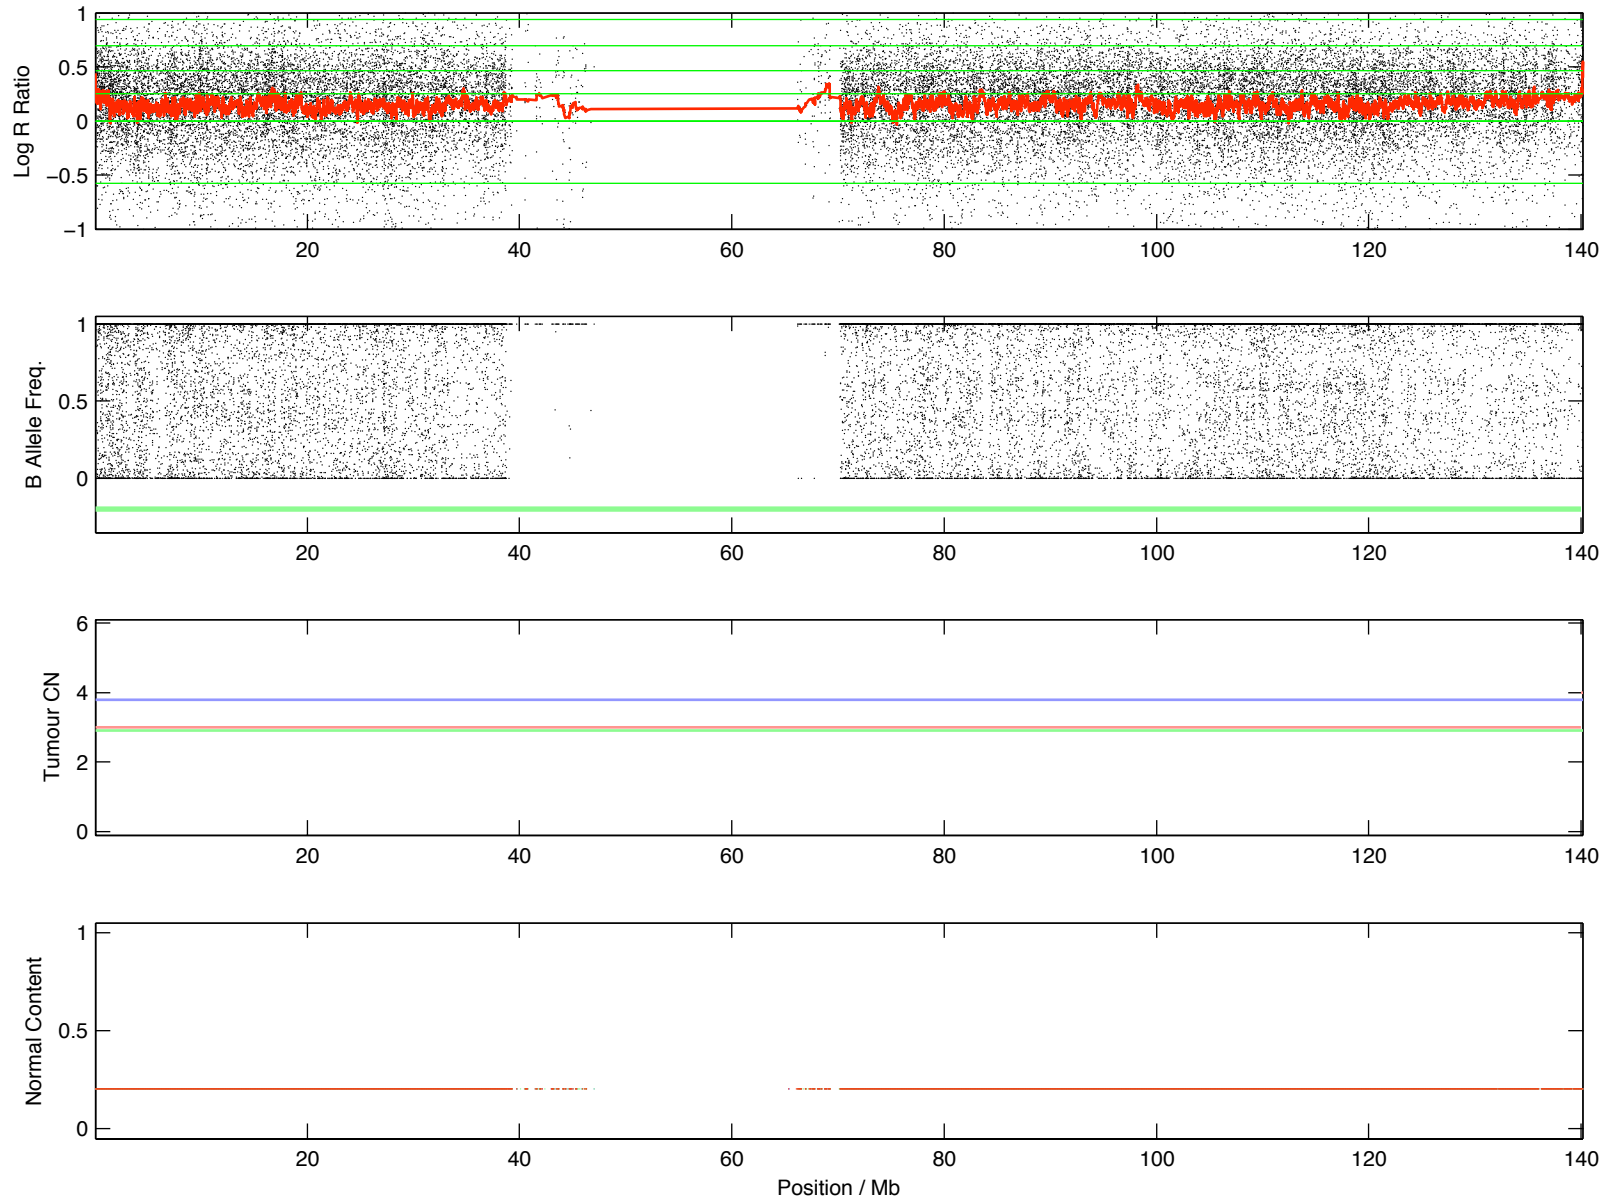

Chromosome: 10

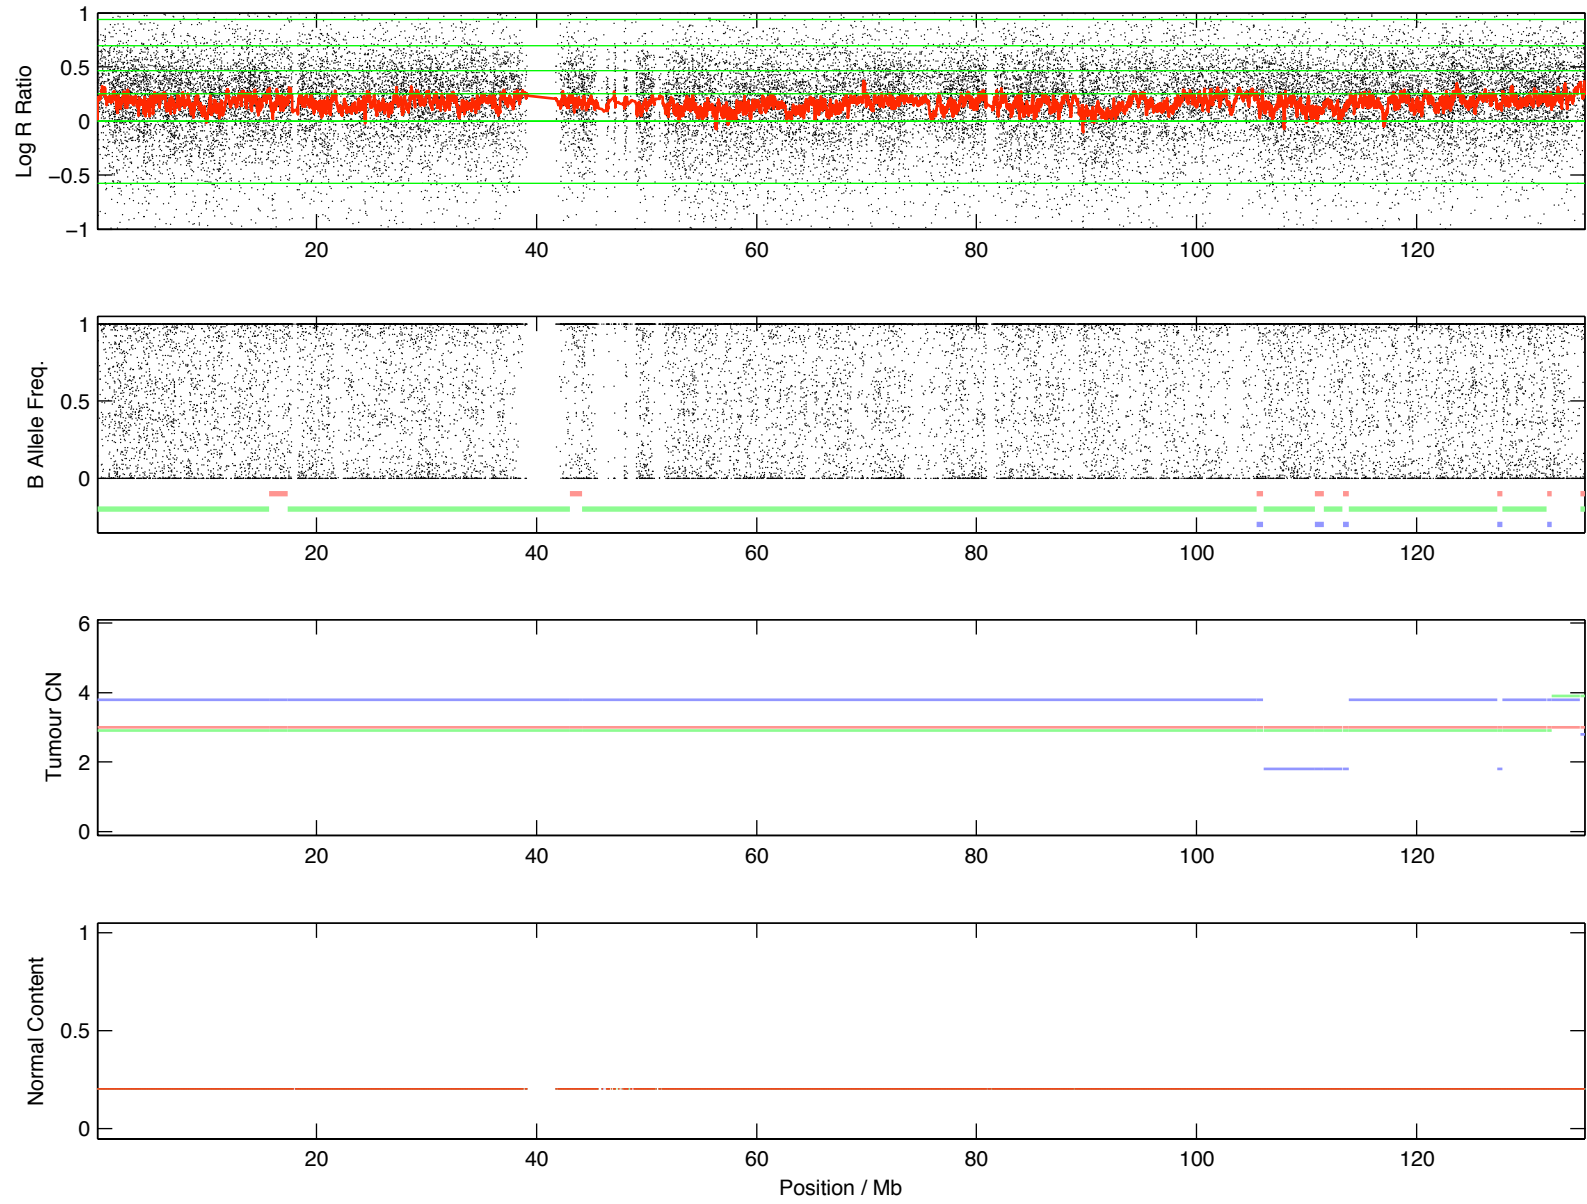

Chromosome: 11

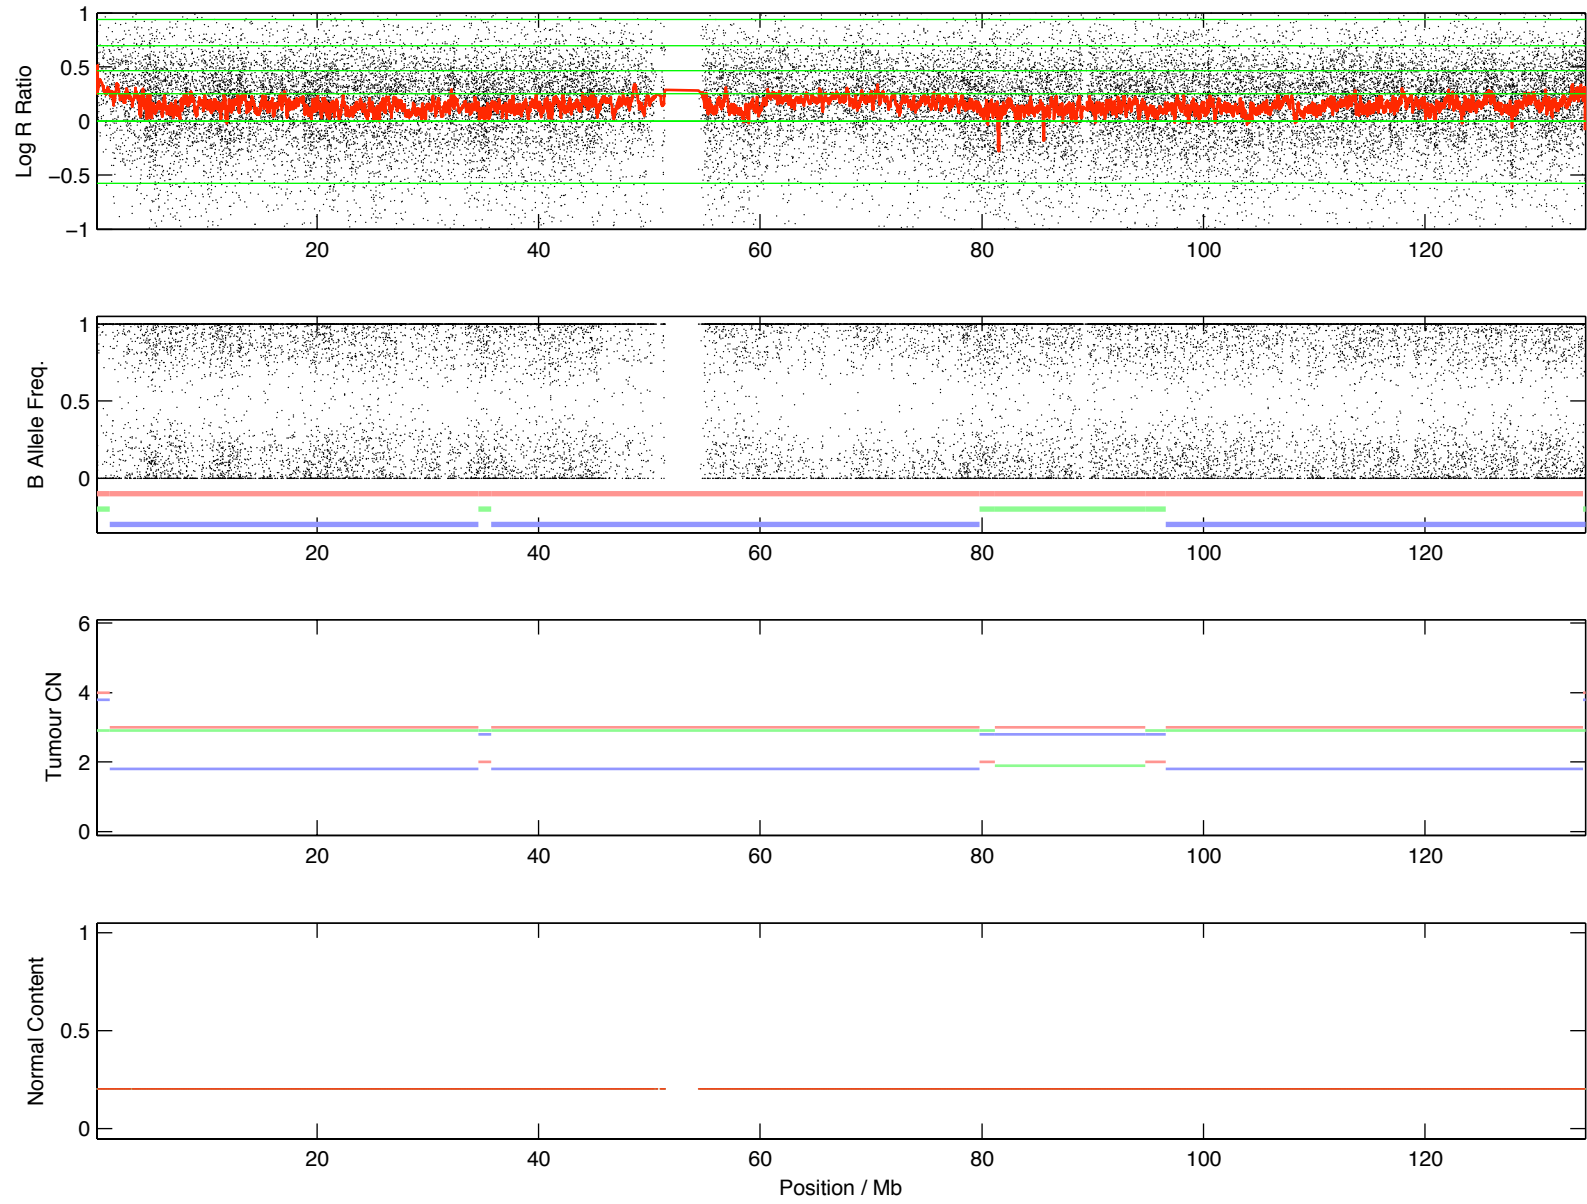

Chromosome: 12

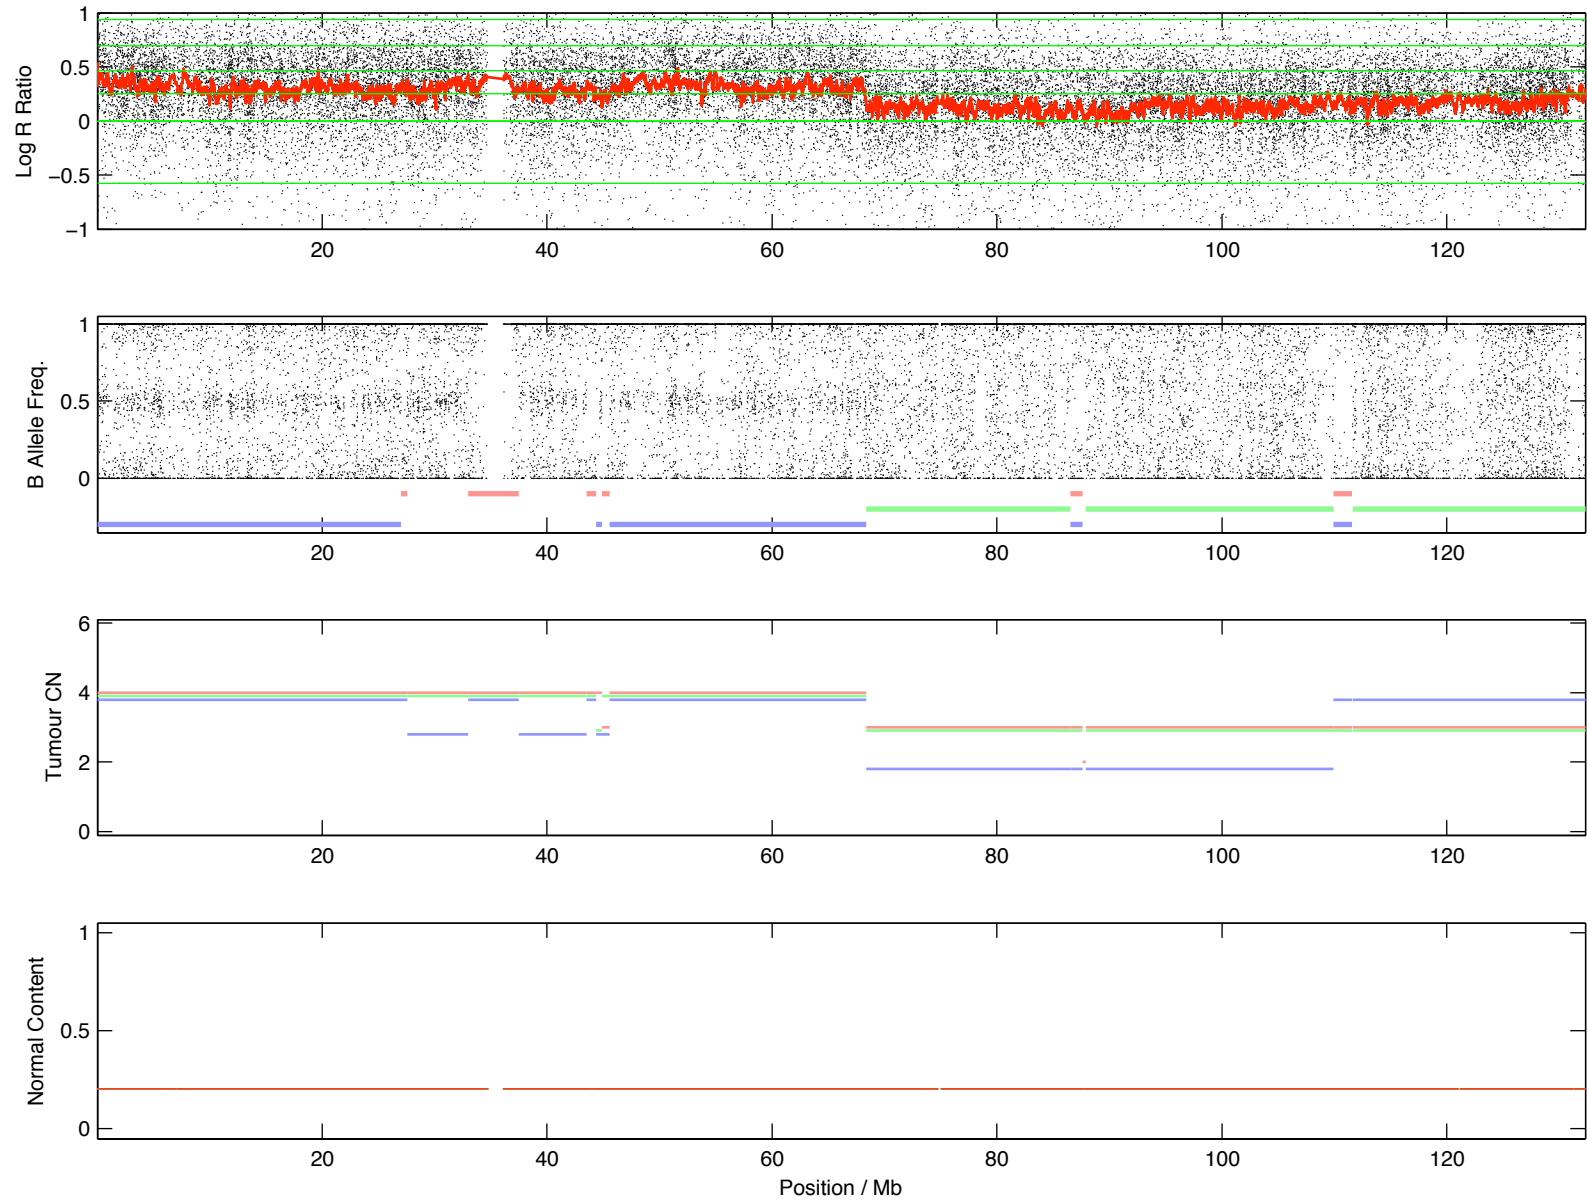

Chromosome: 13

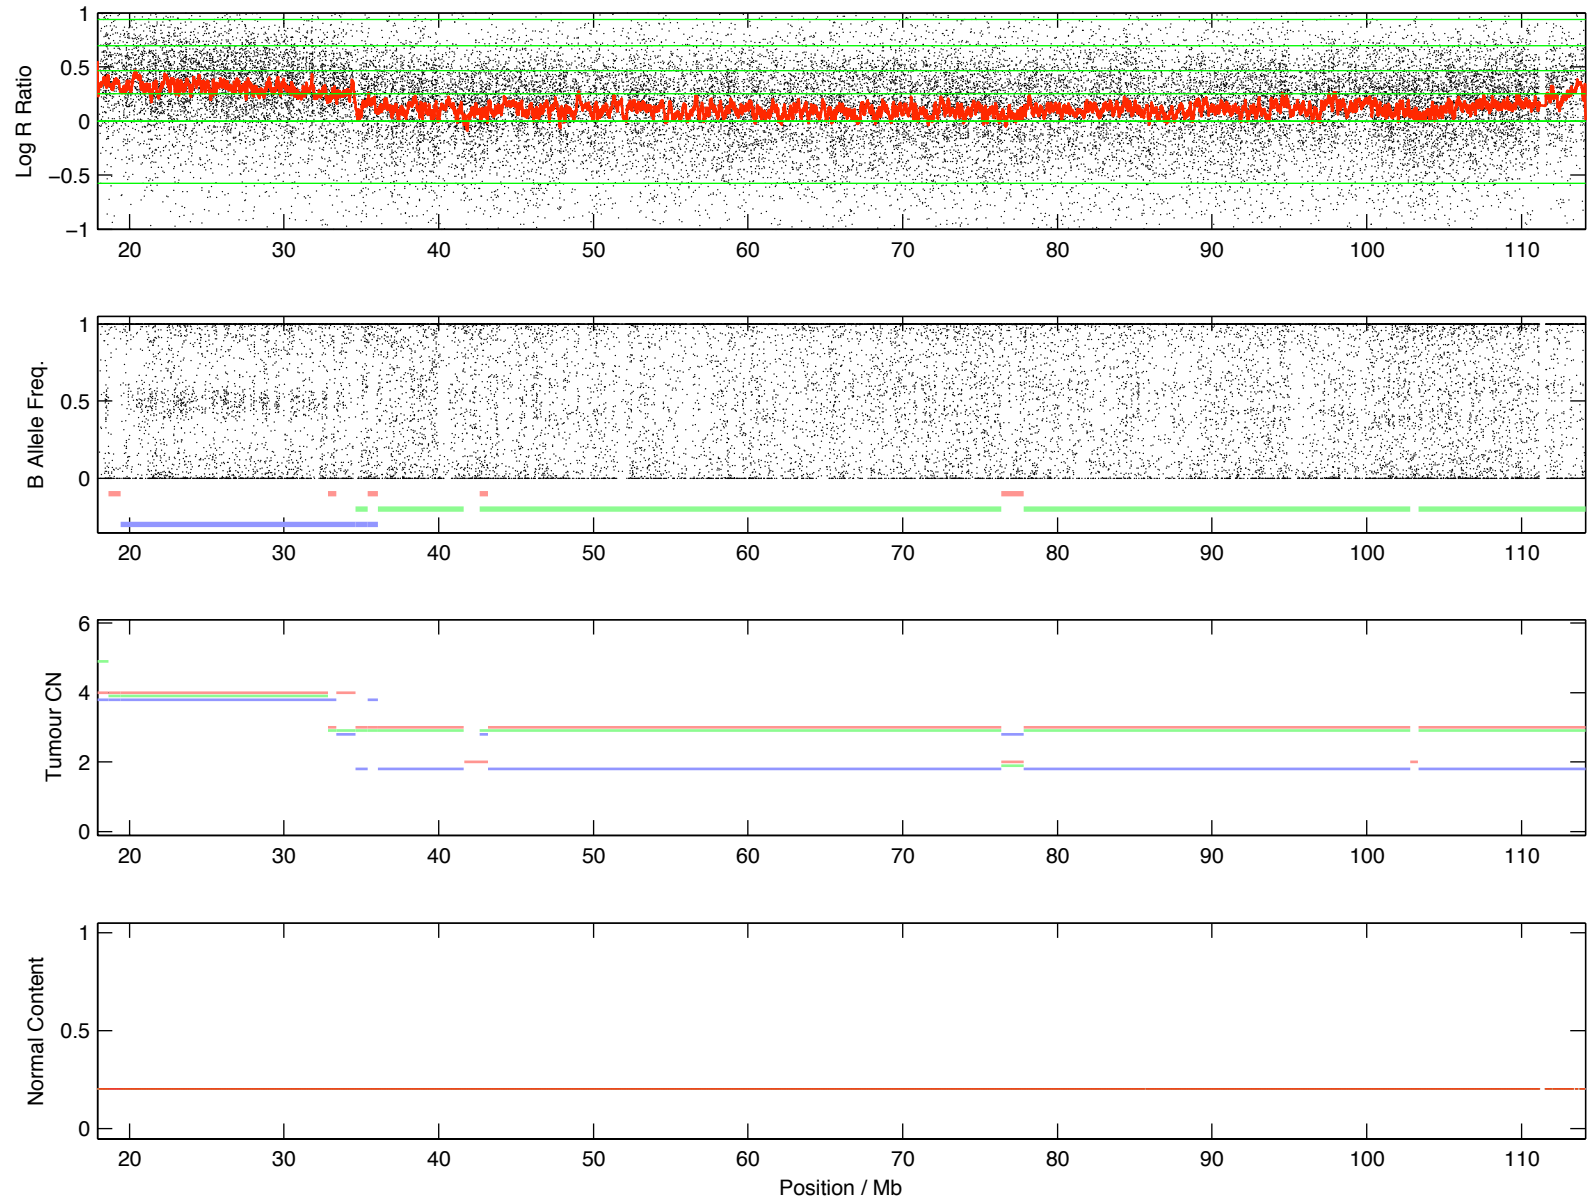

Chromosome: 14

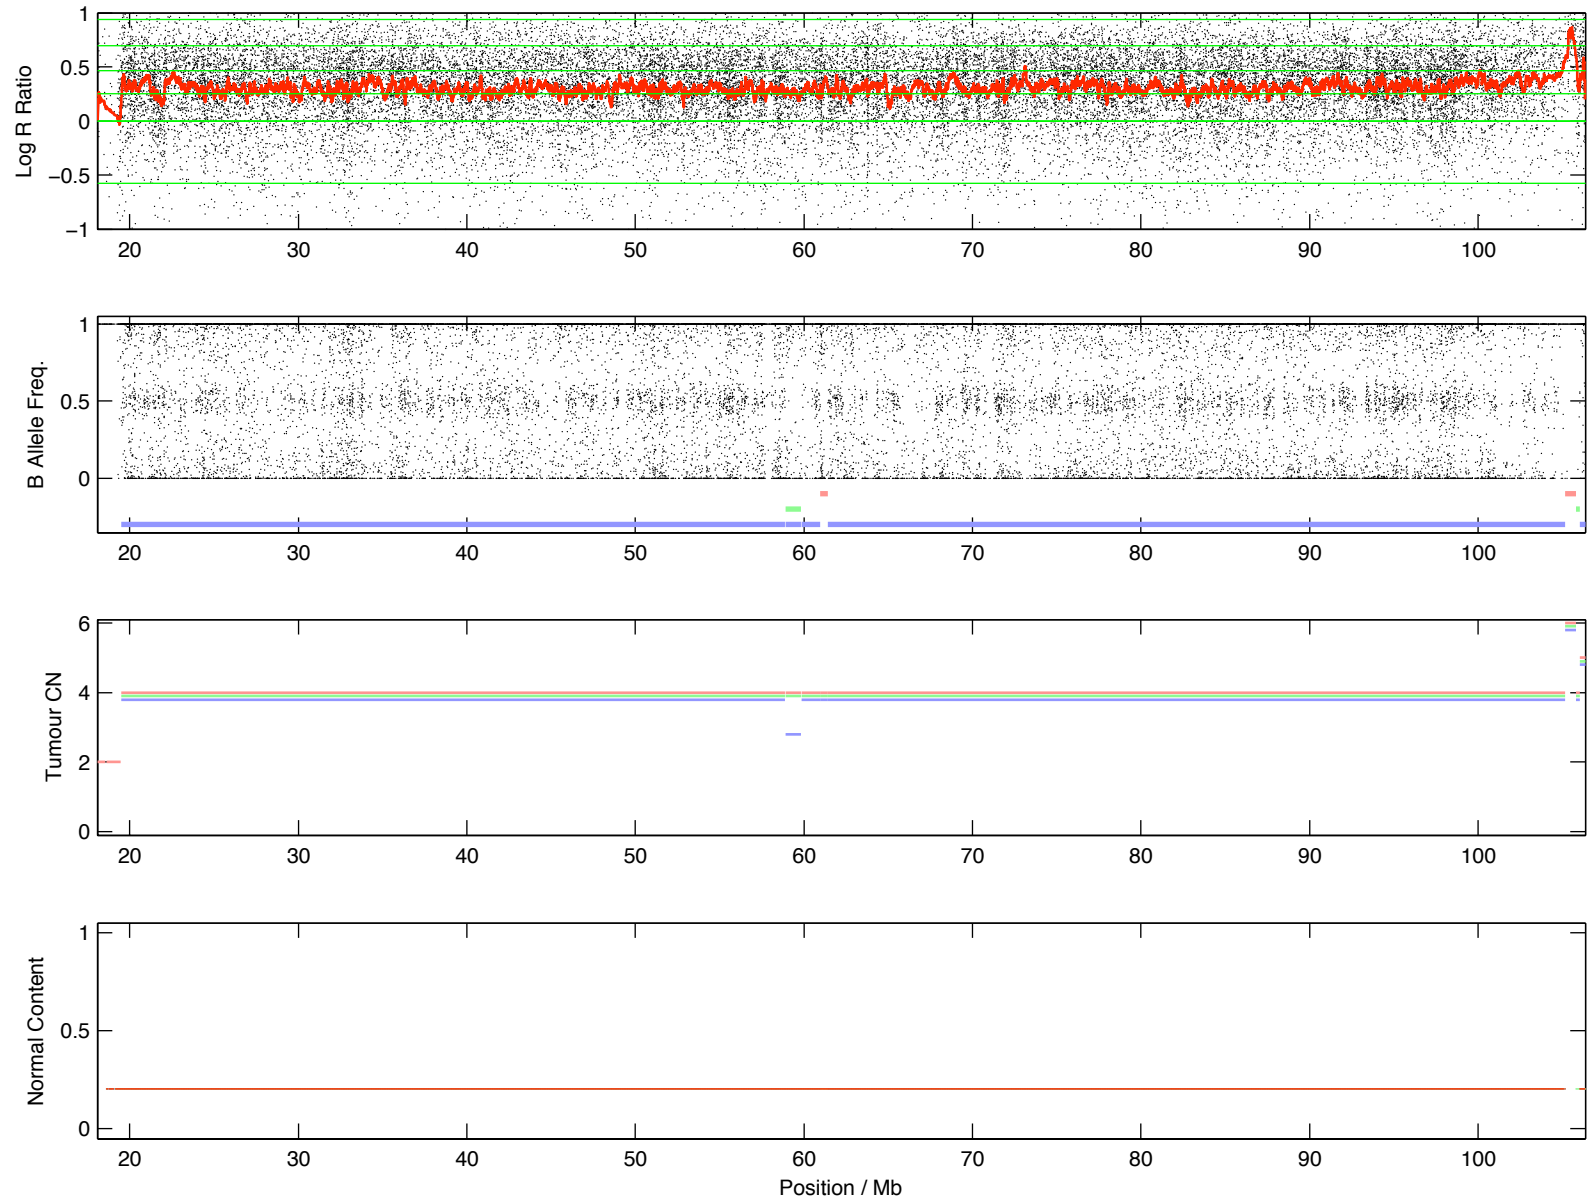

Chromosome: 15

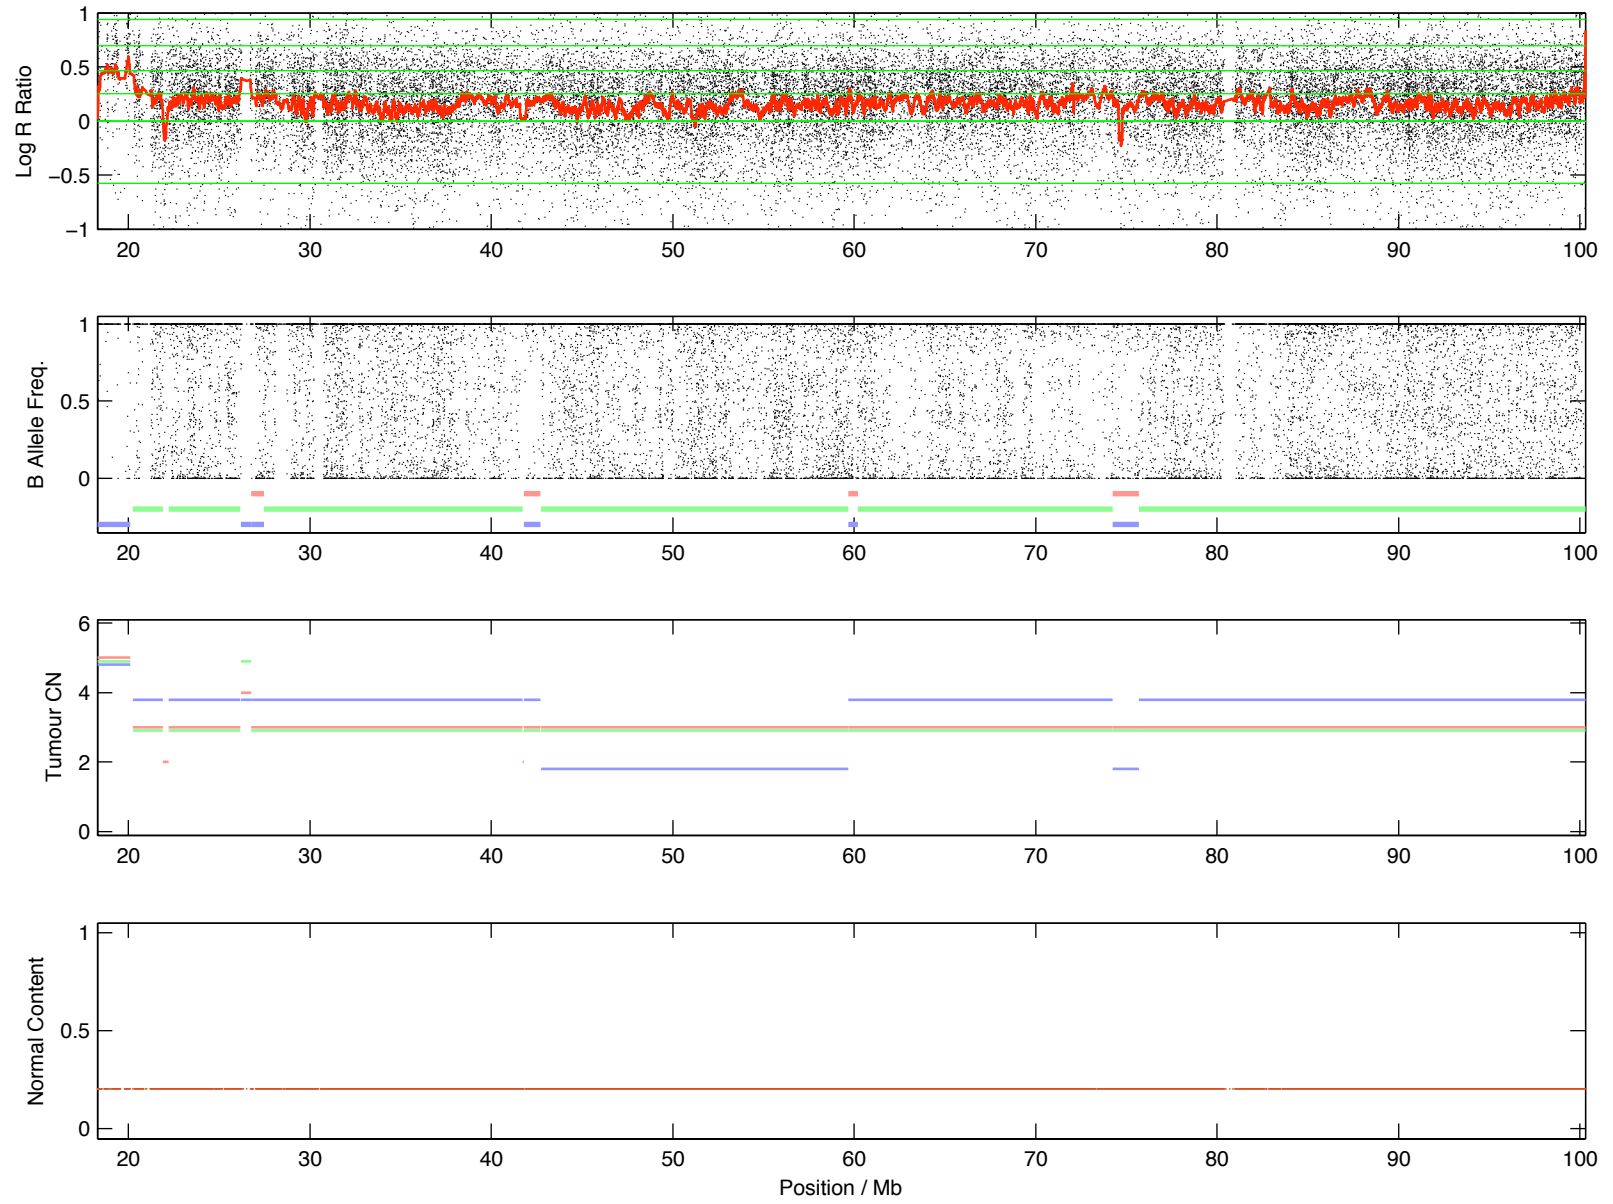

Chromosome: 16

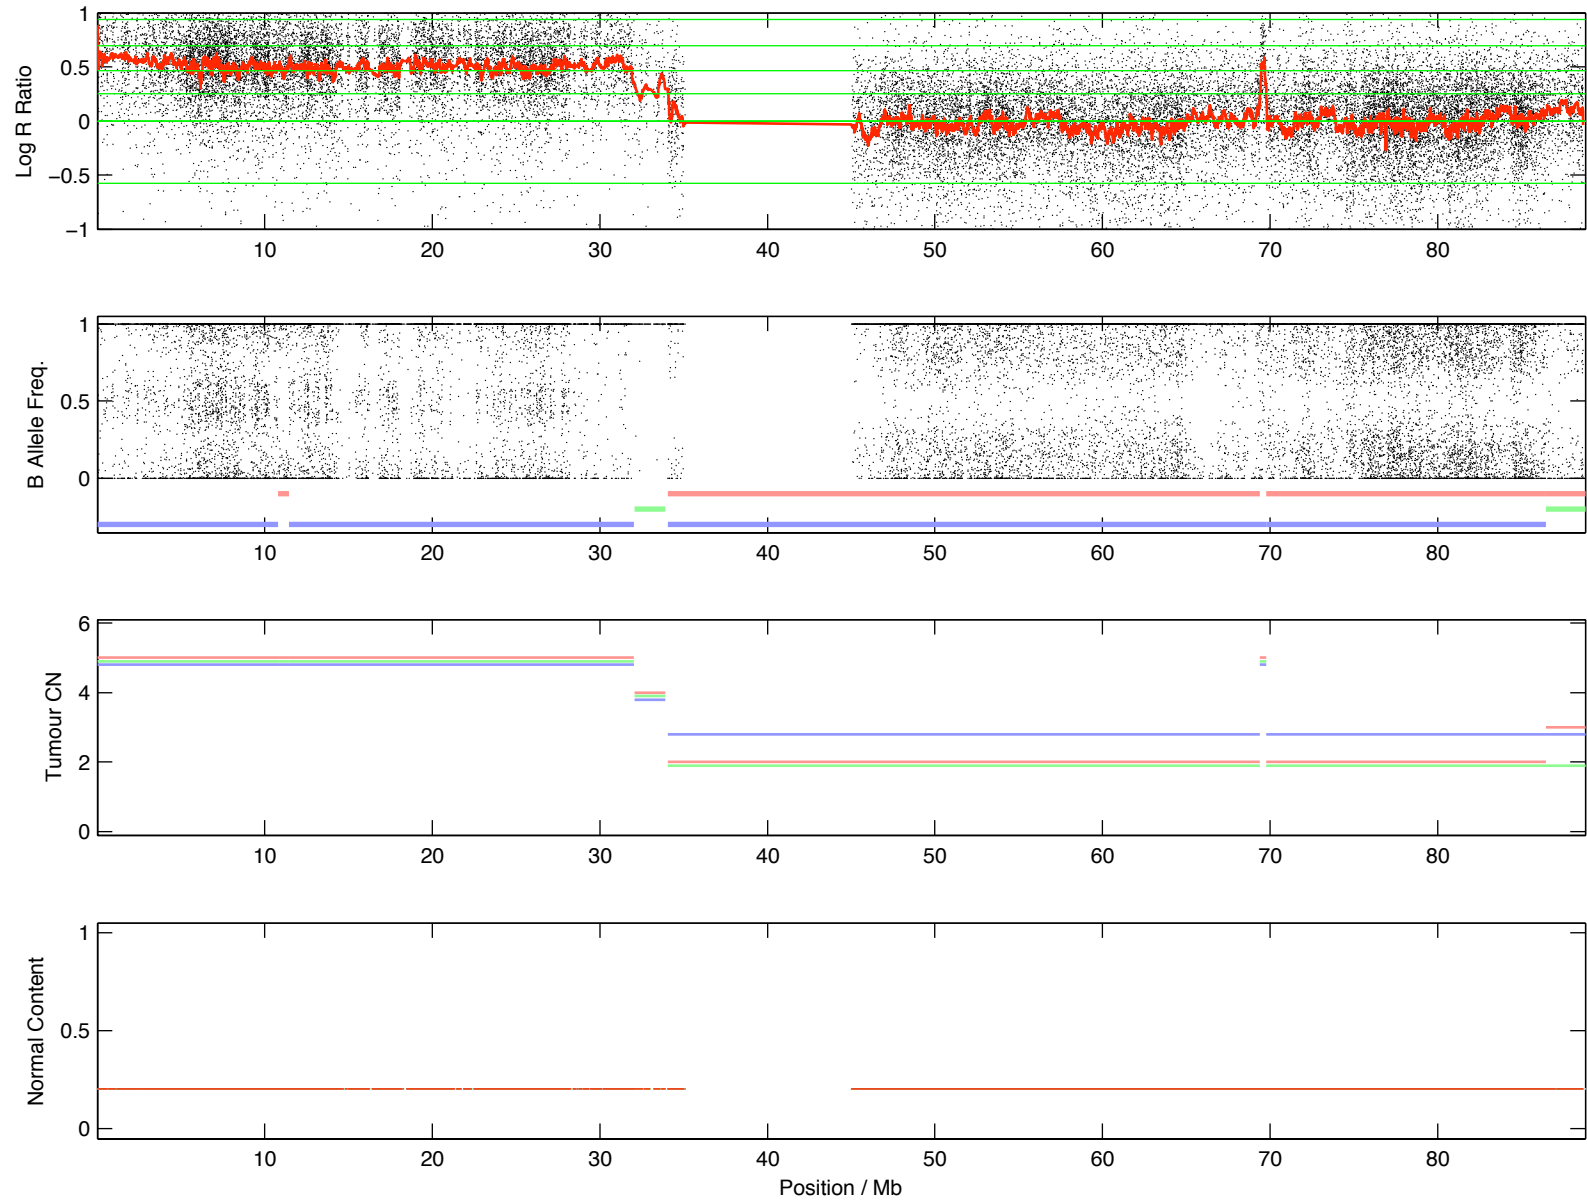



Chromosome: 17

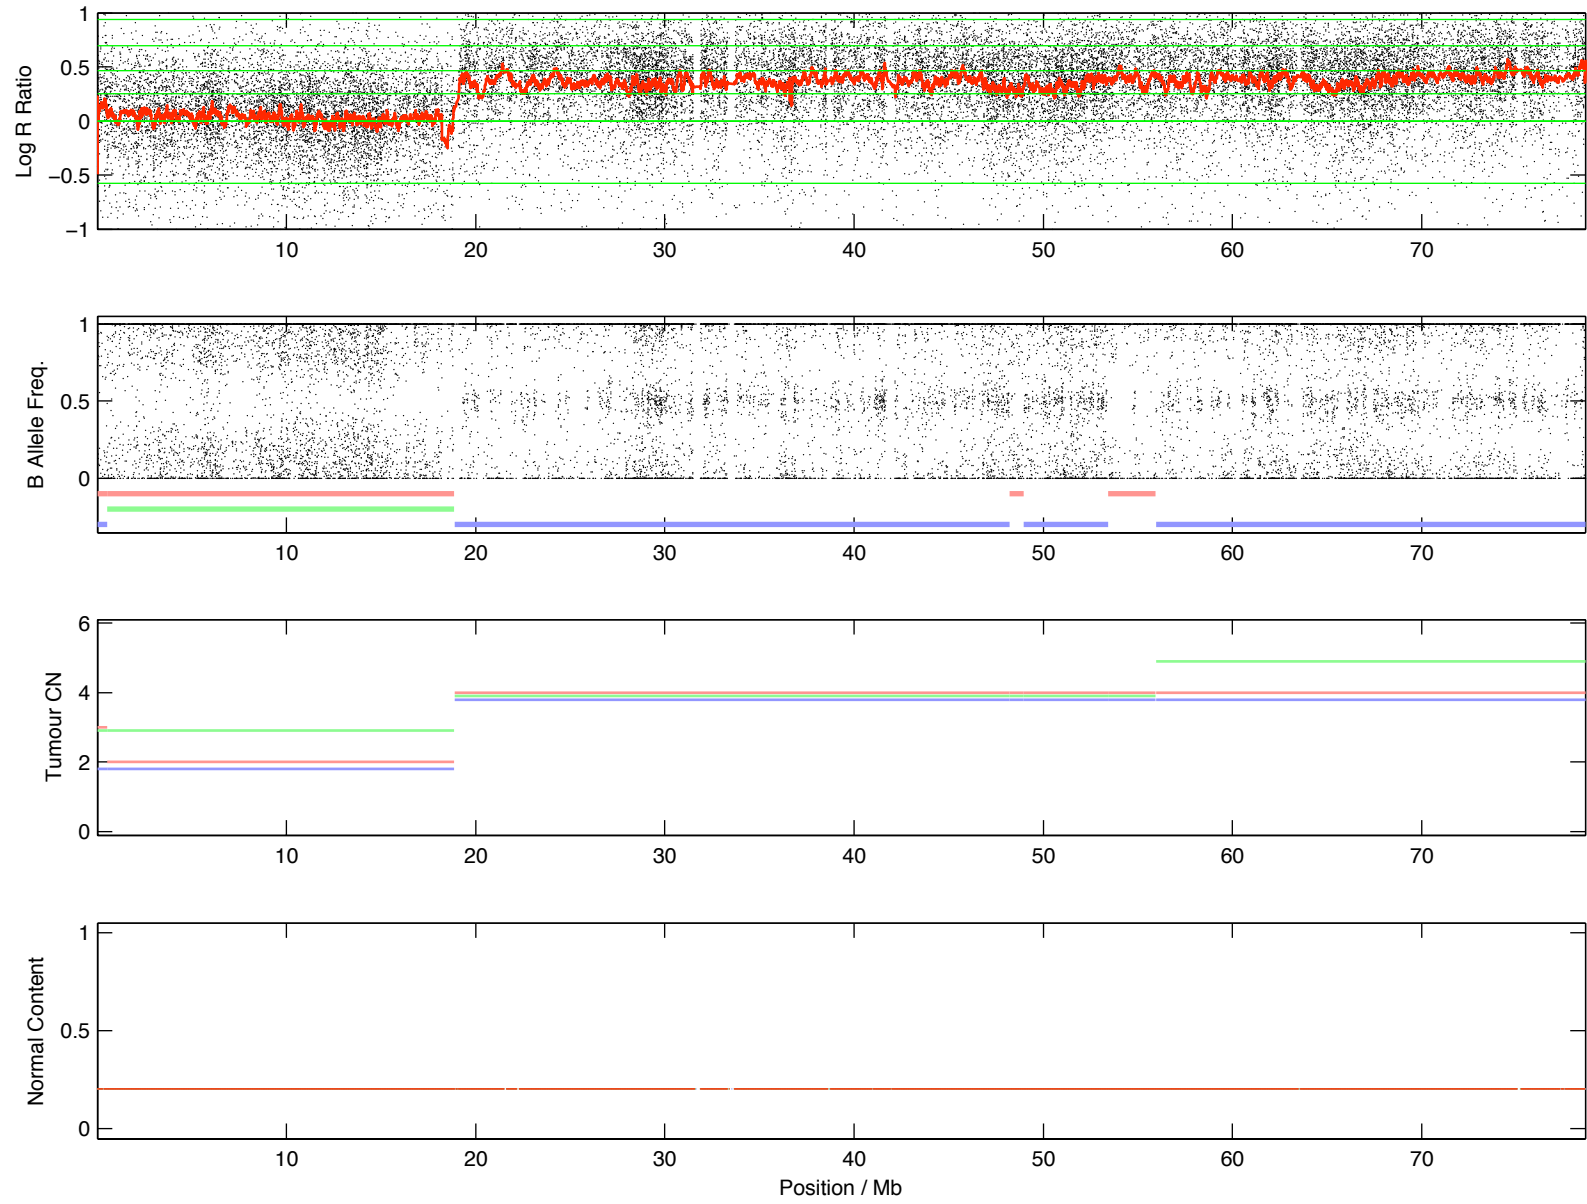

Chromosome: 18

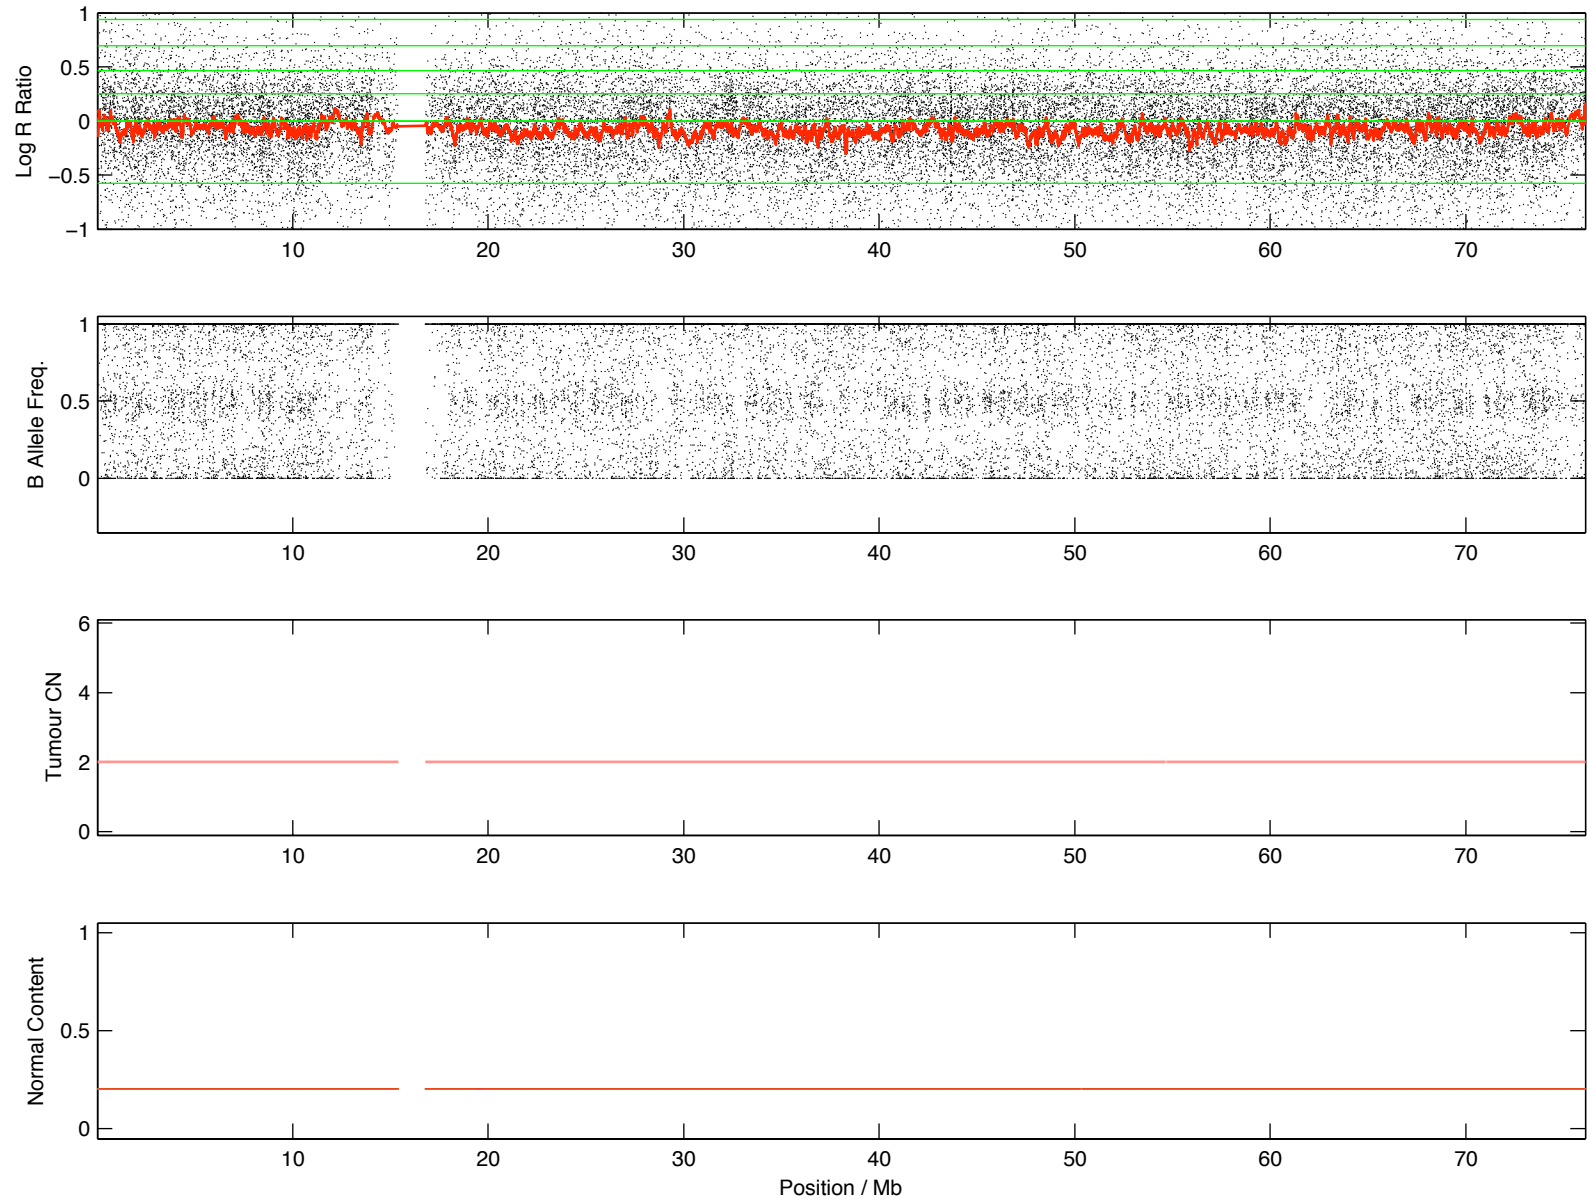

Chromosome: 19

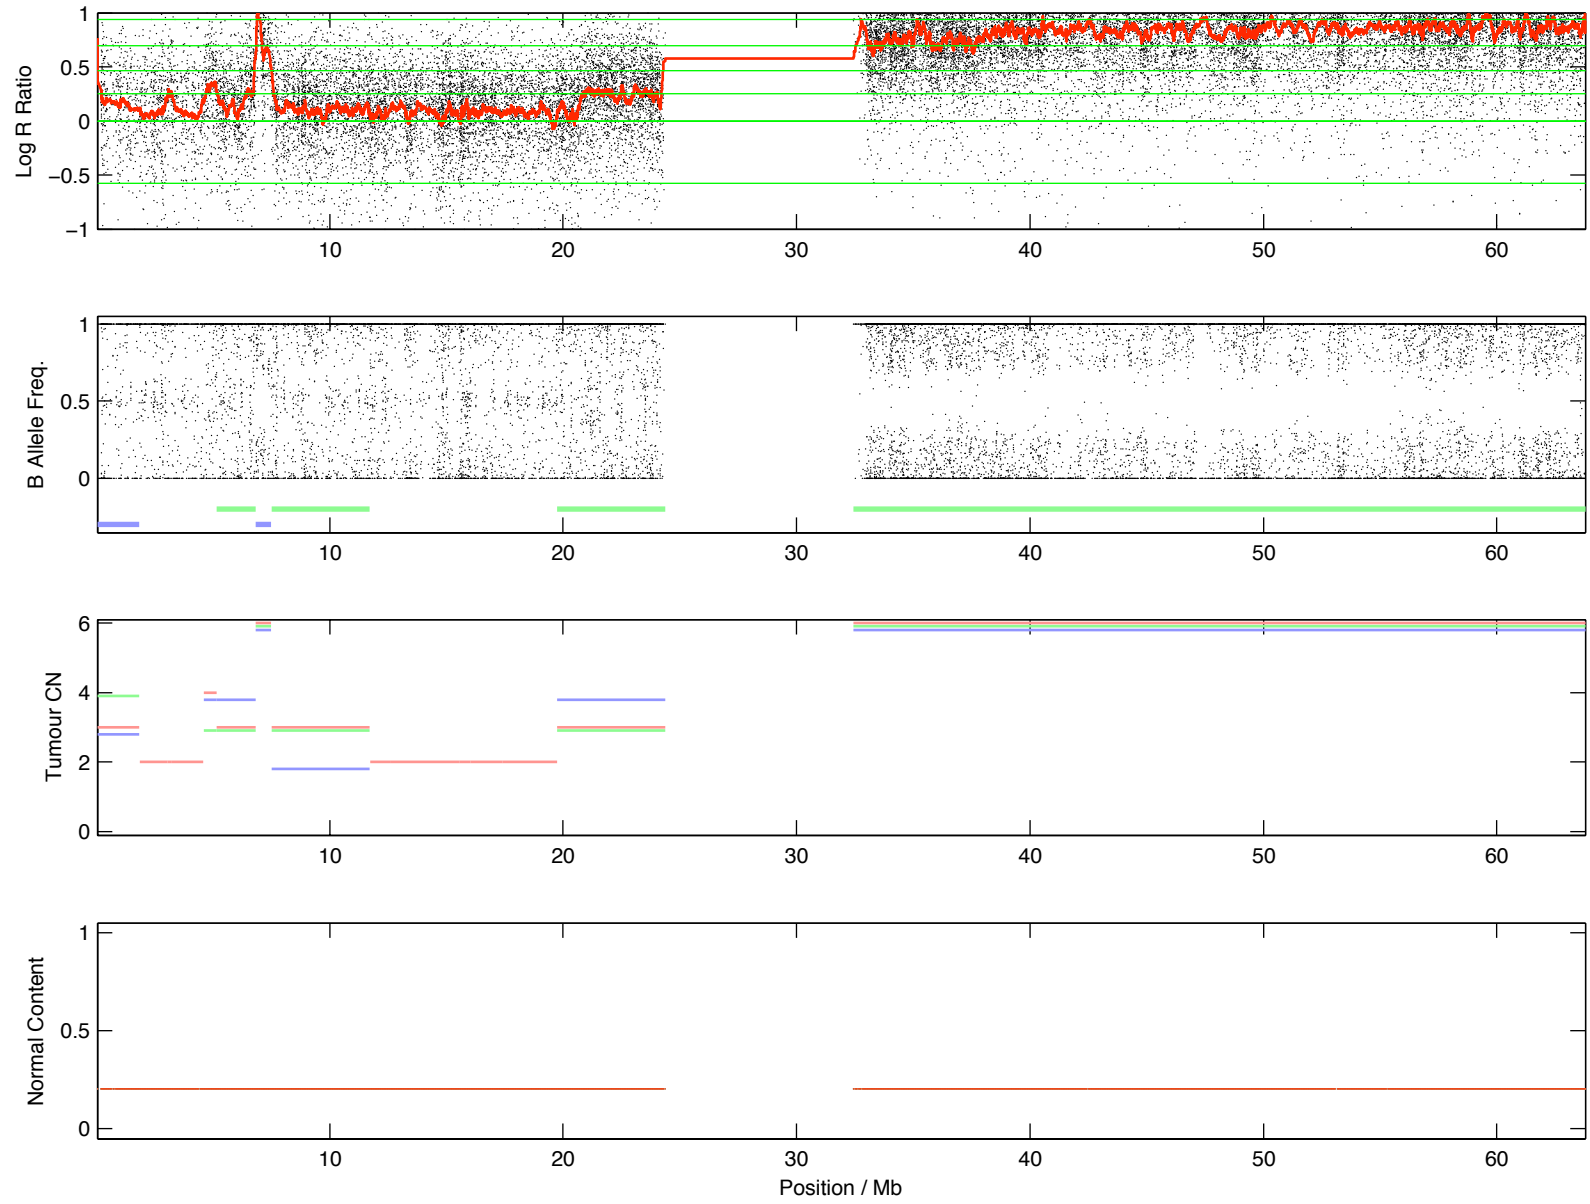

Chromosome: 20

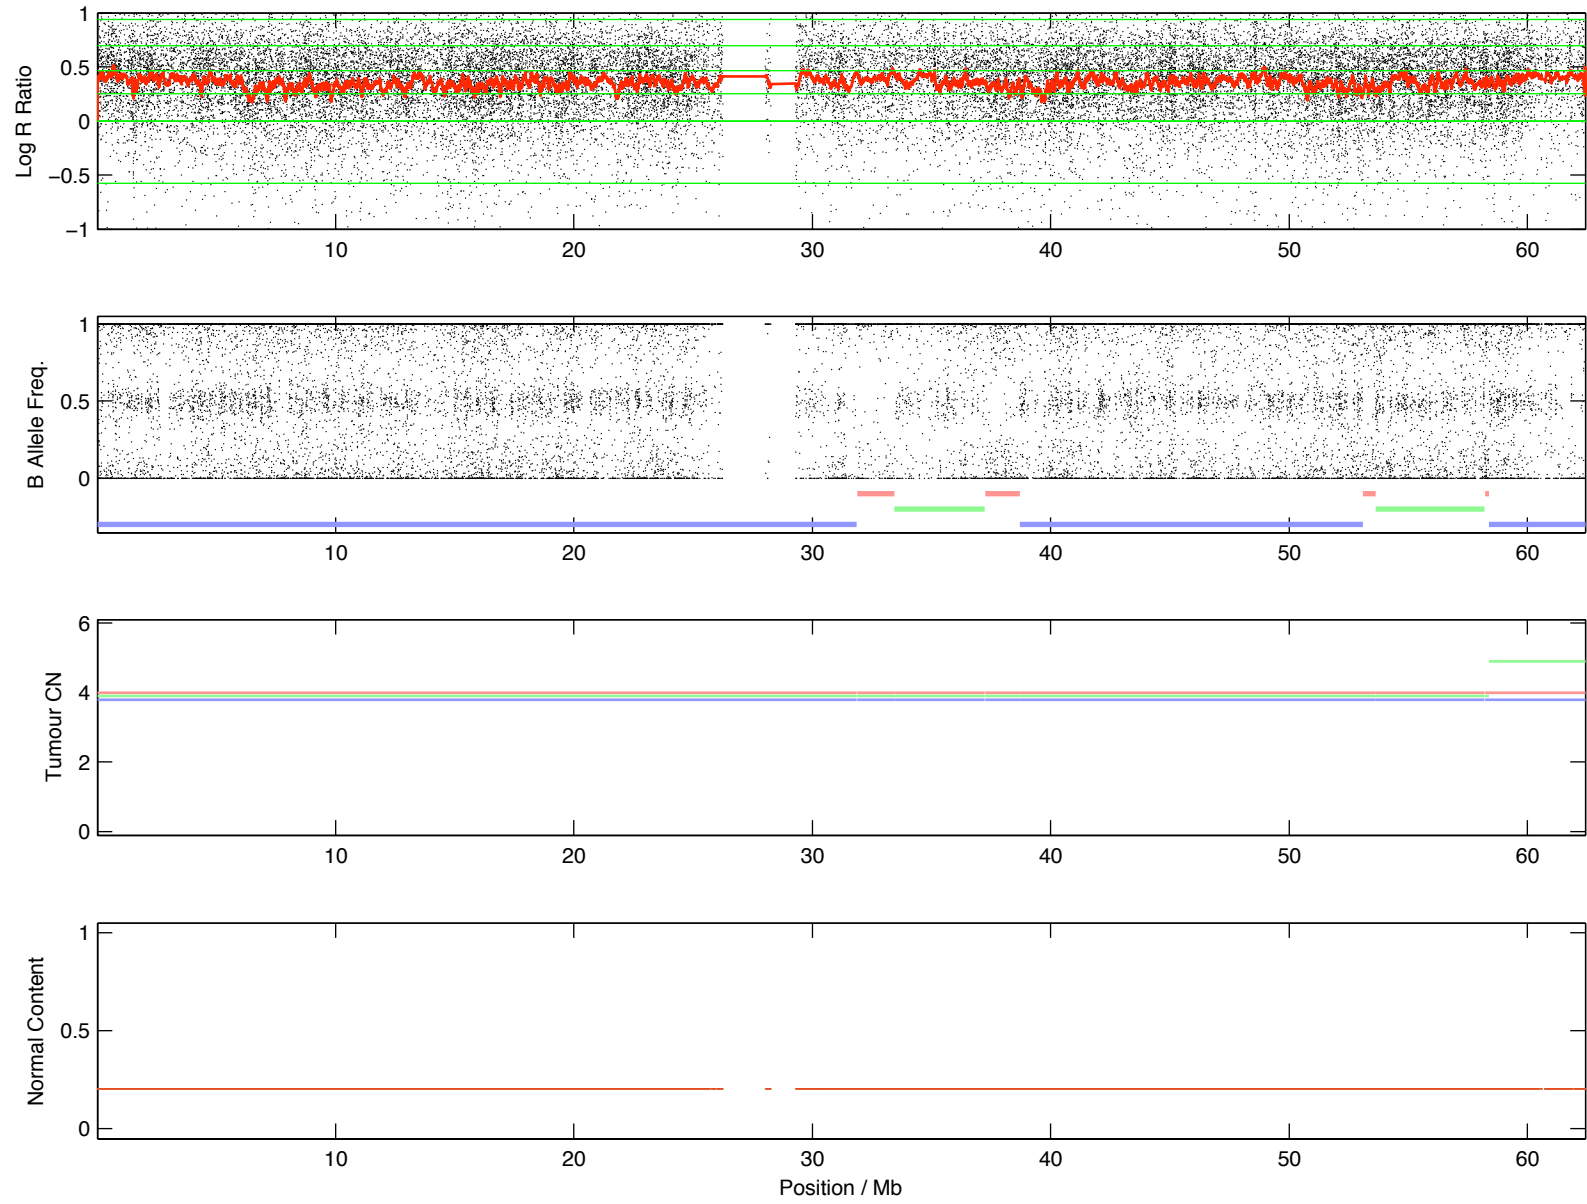

Chromosome: 21

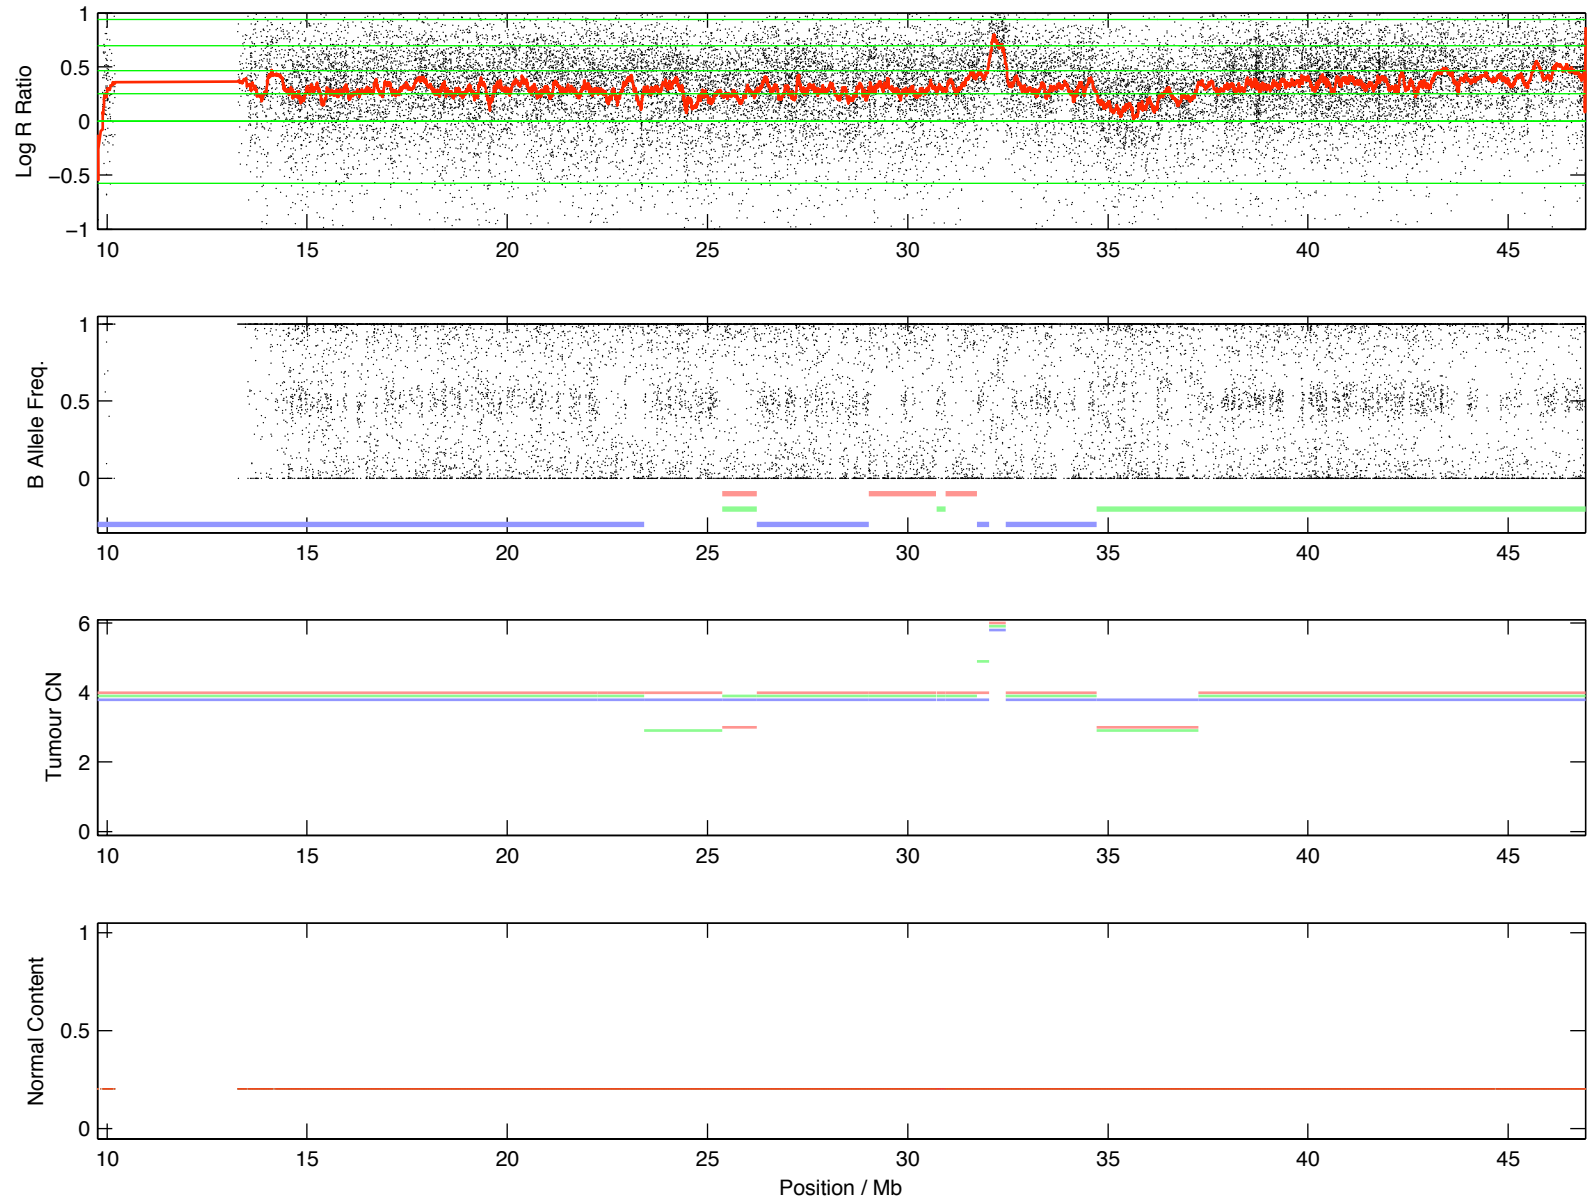

Chromosome: 22

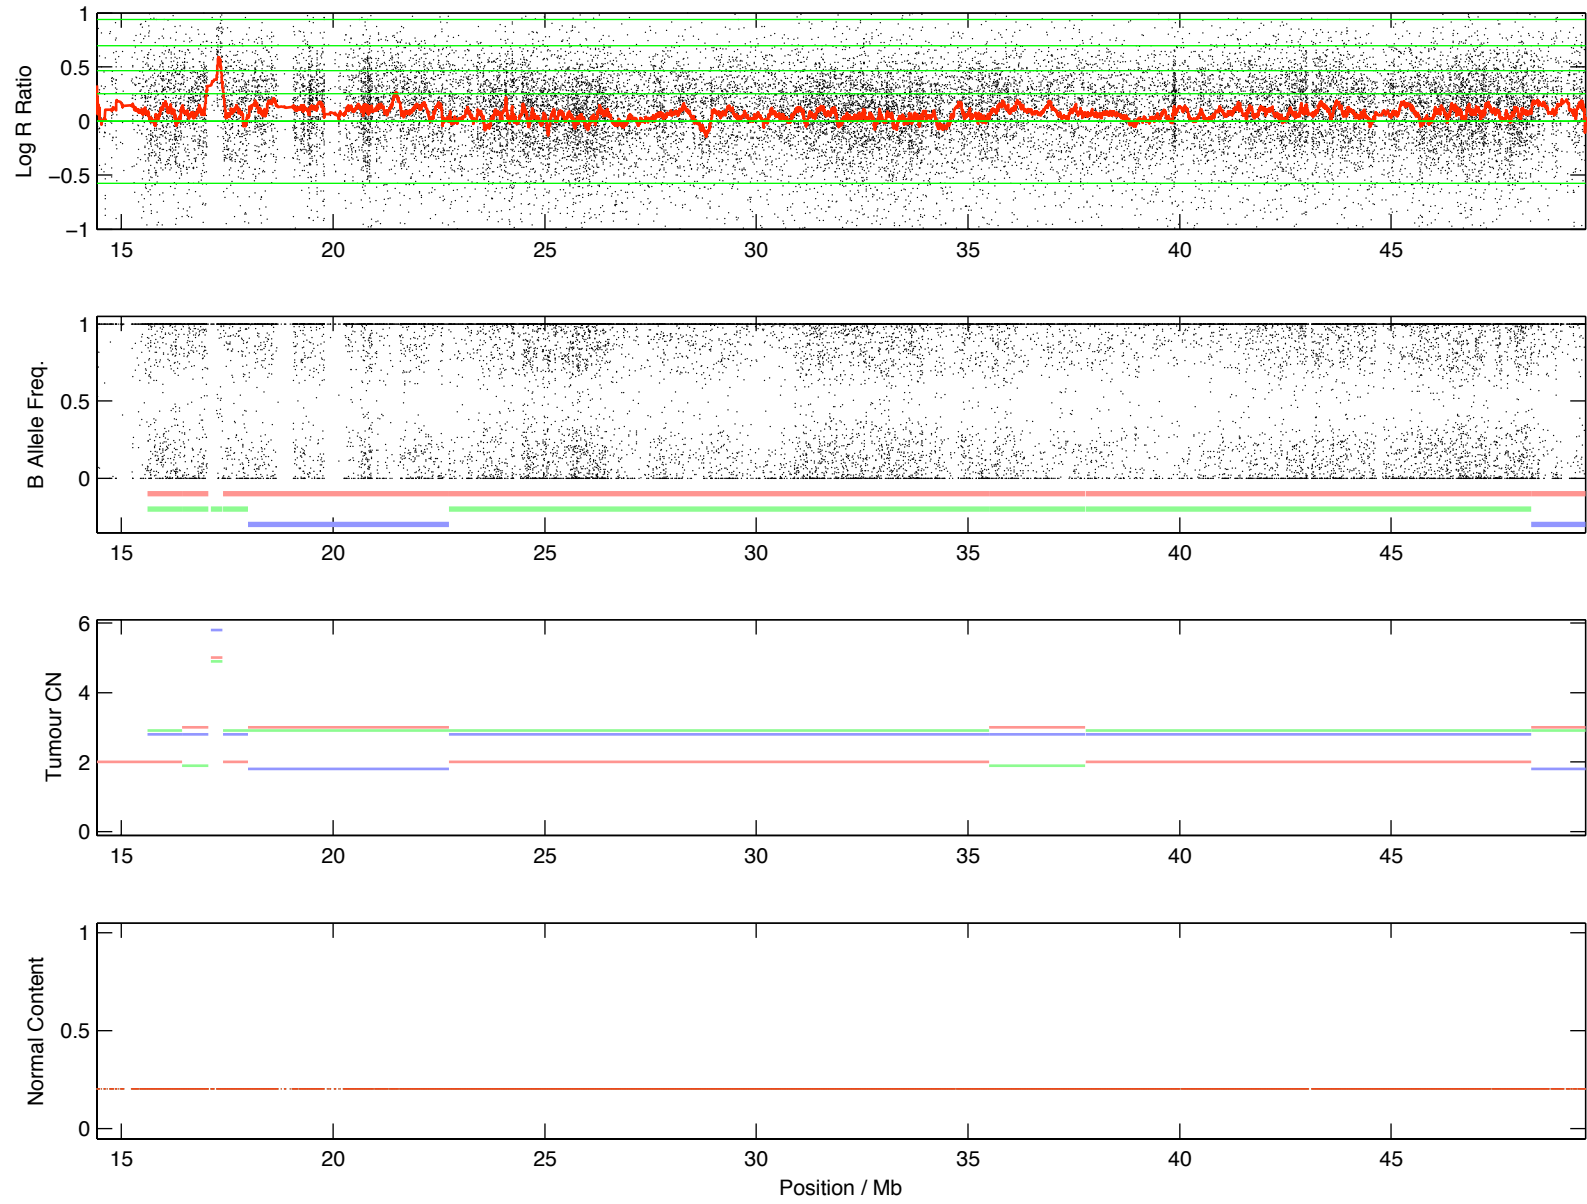

Supplement: pone.0041551.s002.pdf [file pone.0041551.s002.pdf]
